# Supplementary material for: The non-HDL-C to APOB ratio as a predictor of inaccurate LDL-C measurement in patients with chronic intrahepatic cholestasis and jaundice: a retrospective study
Source: PeerJ. 2024 Oct 4;12:e18224. doi: 10.7717/peerj.18224 (PMC11457871; doi:10.7717/peerj.18224)
Supplement: Supplemental Information 1 [file peerj-12-18224-s001.xlsx]

## Sheet: Chronic cholestatic jaundice
Gender	Age	apoA1	apoB	TC	TG	HDL-C	LDL-C(D)	GGT	ALP	TB	DB	IB	TBA	AST	ALT	LDL-C(F)	Lipid testing	（TC-HDL-C)/APOB
Male	74	0.88	1.05	4.8	0.98	0.96	3.46	358	314	51.6	35.3	16.3	21.1	128	51	3.39455	accurate	3.65714
Female	54	0.89	0.81	3.64	0.66	1	2.51	648	817	54.6	37.7	16.9	5.7	44	45	2.34	accurate	3.25926
Male	72	1.54	0.71	4.64	0.71	2.03	2.5	626	651	54.8	36.1	18.7	145.4	149	137	2.28727	accurate	3.67606
Male	47	0.73	1.61	8.29	0.95	0.74	6.06	483	354	54.9	34.8	20.1	110	317	148	7.11818	accurate	4.68944
Male	65	0.73	2.53	11.33	1.53	0.73	9.44	404	291	55	28.6	26.4	43.8	840	59	9.90455	accurate	4.18972
Female	60	0.56	1.1	3.75	1.5	0.4	2.41	309	378	55.4	36.1	19.3	52.5	172	27	2.66818	accurate	3.04545
Male	70	0.32	0.97	8.1	1.16	0.39	3.49	210	232	57.8	45.8	12	147.8	89	51	7.18273	inaccurate	7.94845
Male	30	0.28	1.07	3.89	1.4	0.29	2.87	335	623	59.6	32.4	27.2	8.2	328	85	2.96364	accurate	3.36449
Male	56	0.76	0.73	2.85	0.67	0.77	1.94	209	273	60.3	50.7	9.6	3	36	22	1.77545	accurate	2.84932
Female	50	0.66	1.61	5.87	1.85	0.48	4.22	332	591	61.6	44.5	17.1	32.3	37	24	4.54909	accurate	3.34783
Female	68	0.87	1.45	5.65	1.66	0.62	4.27	228	270	62	40.6	21.4	6.8	62	28	4.27545	accurate	3.46897
Male	78	0.79	0.91	4.18	0.95	0.88	2.82	839	608	62	42.1	19.9	44.6	159	68	2.86818	accurate	3.62637
Male	58	0.61	1.99	9.04	2.07	0.65	6.88	294	285	62.4	34.3	28.1	46.6	434	44	7.44909	accurate	4.21608
Male	54	0.98	0.88	3.6	1.15	0.92	2.44	271	190	62.5	33.5	29	12.3	23	18	2.15727	accurate	3.04545
Male	55	0.55	1.22	4.93	1.46	0.69	3.37	721	604	64.8	52.7	12.1	33.6	97	32	3.57636	accurate	3.47541
Male	58	1.12	0.67	3.45	1.19	1.15	1.84	381	223	71.4	60.1	11.3	3.8	46	75	1.75909	accurate	3.43284
Male	58	0.65	1.79	8.67	1.83	0.69	6.39	311	361	72.1	39.7	32.4	81.2	437	49	7.14818	accurate	4.4581
Female	33	0.81	1.08	3.94	1.68	0.62	2.38	585	245	72.5	54.3	18.2	9.5	343	31	2.55636	accurate	3.07407
Male	56	0.92	0.57	3.74	0.75	1.15	1.96	1251	951	75	55.9	19.1	114.8	86	93	2.24909	accurate	4.54386
Male	73	0.83	0.94	4.63	0.96	1.35	2.71	276	308	75.3	44.4	30.9	8	302	56	2.84364	accurate	3.48936
Male	62	1.08	1.05	4.63	2.77	0.86	2.55	508	474	75.5	45.3	30.2	26.7	70	62	2.51091	accurate	3.59048
Female	72	0.66	0.83	11.79	0.93	0.6	2.76	485	1639	76.7	59.3	17.4	38.5	93	60	10.7673	inaccurate	13.4819
Female	63	0.62	1.3	5.85	1.52	0.7	4.15	436	377	78.9	52.7	26.2	226.6	364	93	4.45909	accurate	3.96154
Male	82	0.5	0.9	4.21	0.84	0.47	2.69	428	504	79.5	57.8	21.7	114.8	557	348	3.35818	accurate	4.15556
Female	60	0.64	0.96	3.22	1.5	0.54	1.84	215	240	82.6	63.3	19.3	7.1	79	25	1.99818	accurate	2.79167
Female	73	0.49	0.91	12.81	0.95	0.45	3.06	300	1300	84.2	66.3	17.9	79.3	169	67	11.9282	inaccurate	13.5824
Female	64	0.48	1.79	8.49	1.96	0.49	5.73	376	260	85.4	51.2	34.2	43.1	339	42	7.10909	accurate	4.46927
Female	67	0.61	2.09	7.68	2.44	0.46	4.95	560	594	87.6	59.6	28	28.8	135	77	6.11091	accurate	3.45455
Female	54	1.04	1.09	5.42	1.76	0.95	3.24	472	286	88.5	70.6	17.9	15.1	35	31	3.67	inaccurate	4.10092
Female	56	1.38	0.95	7.81	1.03	1.94	4.21	562	1091	92.6	68	24.6	74.5	298	253	5.40182	accurate	6.17895
Male	57	0.77	0.79	4.25	2.13	0.62	1.85	368	451	94.8	61.3	33.5	110.9	198	117	2.66182	accurate	4.59494
Male	58	0.56	1.38	6.73	1.63	0.53	4.25	286	411	95.8	59.3	36.5	71.2	421	46	5.45909	accurate	4.49275
Male	67	0.35	1.57	5.5	1.35	0.33	4.05	243	342	103.4	80.2	23.2	192.6	191	62	4.55636	inaccurate	3.29299
Male	71	0.23	1.22	5.28	1.36	0.3	3.89	306	263	105.8	71.2	34.6	57.8	148	45	4.36182	inaccurate	4.08197
Male	57	0.82	0.86	4.44	2.09	0.68	2.25	356	444	107	68.1	38.9	64.2	209	119	2.81	accurate	4.37209
Female	68	0.71	1.49	7.14	1.23	0.72	4.84	672	1107	108.7	79.1	29.6	56.3	270	99	5.86091	accurate	4.30872
Female	48	0.67	1.38	5.87	1.1	0.58	4.48	388	264	112.4	77	35.4	57	186	121	4.79	accurate	3.83333
Male	57	0.7	1.1	9.19	1.8	0.53	3.4	954	346	114.1	85.1	29	86	131	65	7.84182	inaccurate	7.87273
Female	53	0.86	1.35	7.44	1.72	0.85	4.49	715	805	114.2	85.9	28.3	41.8	105	45	5.80818	accurate	4.88148
Female	65	1.58	1.11	7.68	3.35	1.11	3.07	2178	453	116.9	103	13.9	186.9	229	382	5.04727	inaccurate	5.91892
Male	55	0.62	1.69	6.98	2.88	0.37	3.04	1008	497	119.2	78.9	40.3	73.2	151	96	5.30091	inaccurate	3.91124
Female	56	0.72	1	3.7	1.18	0.66	2.58	455	324	123	90	33	15.2	15	12	2.50364	accurate	3.04
Male	68	0.83	0.97	5.9	0.83	0.8	3.28	918	1171	127.8	85.8	42	195.3	195	115	4.72273	inaccurate	5.25773
Male	57	0.71	2.28	9.15	1.29	0.57	7.8	707	325	131.8	86.3	45.5	7.1	70	38	7.99364	accurate	3.76316
Male	42	0.27	1.32	4.88	1.28	0.37	3.16	524	598	145	101.8	43.2	118.2	291	91	3.92818	inaccurate	3.41667
Male	55	0.31	2.23	6.64	4.27	0.22	2.15	314	485	145.5	109.4	36.1	61.4	107	42	4.47909	inaccurate	2.87892
Female	59	1.17	1	5.33	2.36	0.78	2.24	871	863	153.8	120.3	33.5	276.9	96	179	3.47727	inaccurate	4.55
Female	48	0.36	1.27	5.61	1.52	0.4	3.2	655	758	169.5	135.5	34	328.4	276	77	4.51909	inaccurate	4.10236
Male	79	0.54	1.44	8.27	1.85	0.38	3.49	415	393	170	107.1	62.9	26.7	169	66	7.04909	inaccurate	5.47917
Male	60	0.19	2.44	13.3	4.44	0.17	5.06	391	313	173.6	120.4	53.2	99.7	669	57	11.1118	accurate	5.38115
Female	53	0.75	0.89	4.28	1.28	0.6	2.46	745	362	190.9	126.8	64.1	130.1	380	131	3.09818	accurate	4.13483
Female	68	0.79	1.15	4.73	2.55	0.52	2.43	408	265	197.1	132.5	64.6	75.3	94	75	3.05091	accurate	3.66087
Female	75	0.48	0.95	4.87	0.94	0.58	2.96	553	714	198.9	134.5	64.4	30.7	173	83	3.86273	inaccurate	4.51579
Female	41	0.34	0.83	4.52	1.05	0.6	1.87	516	297	214.9	174.1	40.8	174.7	91	38	3.44273	inaccurate	4.72289
Male	56	0.75	1.04	12.39	2.43	0.28	2.27	934	1063	241.1	171.1	70	131.2	197	298	11.0055	inaccurate	11.6442
Female	70	0.68	0.87	11.07	1.11	0.29	2.3	691	1685	294.1	196.8	97.3	324.3	498	376	10.2755	inaccurate	12.3908
Male	58	0.34	1.41	5.54	1.75	0.35	3.35	894	544	300.1	179.4	120.7	298.2	432	211	4.39455	inaccurate	3.68085
Male	71	0.35	1.7	7.56	2.33	0.31	2.82	582	601	301.3	195.9	105.4	234	351	70	6.19091	inaccurate	4.26471
Female	67	0.65	1.43	7.73	1.78	0.43	2.76	257	786	347.6	225.1	122.5	113.2	152	102	6.49091	inaccurate	5.1049
Male	68	0.45	0.69	7.94	0.81	0.45	2.41	1163	1780	356.1	234.5	121.6	171	289	323	7.12182	inaccurate	10.8551
Female	55	0.38	1.46	8.25	2.57	0.28	1.91	1169	849	363.1	243	120.1	123.8	65	141	6.80182	inaccurate	5.4589

## Sheet: acute cholestatic jaundice
Gender	Age	apoA1	apoB	TC	TG	HDL-C	LDL-C(D)	GGT	ALP	TB	DB	IB	TBA	AST	ALT	LDL-C(F)	Lipid testing	（TC-HDL-C)/APOB
Male	70	1.07	0.74	3.77	0.92	1.15	2.33	193	225	53.5	37.7	15.8	29.4	126	94	2.20182	accurate	3.54054
Male	79	1.1	1.73	7.32	1.64	0.93	5.51	830	475	53.9	37.1	16.8	15.3	140	67	5.64455	accurate	3.69364
Male	30	1.06	0.99	4.44	1.66	1.01	2.83	315	319	54.1	39.7	14.4	31.1	123	211	2.67545	accurate	3.46465
Male	63	0.69	0.83	3.57	1.06	0.78	2.21	280	233	54.5	45.4	9.1	46.1	178	87	2.30818	accurate	3.36145
Male	55	0.67	0.77	2.94	1	0.53	1.89	635	188	55.3	31.4	23.9	65	123	39	1.95545	accurate	3.12987
Female	60	0.7	1.14	4.35	1.5	0.49	3.07	371	376	56.4	39	17.4	62.7	197	32	3.17818	accurate	3.38596
Female	67	0.92	0.75	4.51	1.24	0.95	2.09	1264	1169	59.7	48.5	11.2	65.4	295	71	2.99636	accurate	4.74667
Female	52	1.13	0.94	4.7	0.97	1.23	3.35	694	314	60.2	38.6	21.6	208.7	351	309	3.02909	accurate	3.69149
Female	50	0.55	1.67	5.43	2.52	0.37	3.29	239	501	61.2	45.3	15.9	24.5	37	23	3.91455	inaccurate	3.02994
Female	92	1.08	0.59	3.67	0.82	1.47	1.97	494	379	63	44.8	18.2	124.1	402	421	1.82727	accurate	3.72881
Male	77	0.74	1.09	4.14	2.41	0.6	2.49	462	258	68.4	47.5	20.9	23.1	128	82	2.44455	accurate	3.24771
Female	39	1.34	0.71	3.95	0.9	1.42	2.32	438	195	72.9	44.5	28.4	197.5	376	347	2.12091	accurate	3.56338
Female	49	0.46	0.97	4.36	1.27	0.48	2.43	180	272	75.6	52.7	22.9	311.7	140	58	3.30273	accurate	4
Female	43	1.61	1.13	7.18	2.12	1.55	4.39	905	276	76.1	47.4	28.7	241.8	111	252	4.66636	accurate	4.9823
Male	63	1.12	1.06	5.75	2.01	1.2	3.35	952	244	76.5	52.5	24	248.1	100	276	3.63636	inaccurate	4.29245
Male	35	0.45	1.09	4.53	1.21	0.44	2.96	564	441	82	48.3	33.7	48.8	287	30	3.54	inaccurate	3.75229
Male	65	0.37	1.17	6.25	1.79	0.37	3.32	457	396	83.5	54.5	29	28	247	43	5.06636	inaccurate	5.02564
Female	45	0.76	0.66	3.48	0.58	1	1.96	330	855	83.8	61.1	22.7	78.1	88	64	2.21636	accurate	3.75758
Male	63	1.63	0.98	5.35	1.25	1.82	3.37	702	418	87.2	59.9	27.3	214.5	244	233	2.96182	inaccurate	3.60204
Female	50	0.41	1.84	5.68	3.02	0.32	3.05	274	542	89.3	62.1	27.2	107	49	38	3.98727	inaccurate	2.91304
Female	48	1.22	0.88	4.58	1.36	1.07	3.11	480	159	91	55.6	35.4	7	122	200	2.89182	accurate	3.98864
Male	62	0.85	1.29	5.55	1.32	0.87	3.66	792	555	95.2	59.5	35.7	44.9	94	37	4.08	accurate	3.62791
Female	48	0.45	1.18	5.92	1.17	0.52	3.44	687	859	95.4	78.4	17	77.9	203	78	4.86818	inaccurate	4.57627
Female	66	0.81	0.83	3.99	1.44	0.82	2.41	581	342	96.6	66.5	30.1	124.8	155	181	2.51545	accurate	3.81928
Female	75	0.65	1.45	6.49	1.17	0.57	4.78	612	727	100.4	66.1	34.3	19.5	134	60	5.38818	accurate	4.08276
Female	69	1.17	1.2	5.35	1.45	1.11	3.57	823	239	103.8	67.3	36.5	277.5	70	252	3.58091	accurate	3.53333
Male	55	0.75	1.79	7.43	2.7	0.53	4.34	1224	512	104.8	73.9	30.9	38.5	138	95	5.67273	accurate	3.85475
Male	64	0.95	0.62	3.1	1.35	0.86	1.89	805	200	106.9	66.8	40.1	225.7	342	518	1.62636	accurate	3.6129
Female	56	0.76	2.08	8.67	4.73	0.3	3.16	569	404	109.4	74.9	34.5	219.8	161	126	6.22	inaccurate	4.02404
Female	63	0.41	1.06	5.26	1.37	0.46	3.45	438	268	114.2	71.8	42.4	363.6	306	82	4.17727	inaccurate	4.5283
Male	54	0.79	0.91	3.84	1.93	0.53	2.38	895	396	120.2	78.7	41.5	189.3	121	191	2.43273	accurate	3.63736
Male	38	0.85	1.24	4.3	1.83	0.6	2.94	218	248	123.3	78.7	44.6	61.9	130	225	2.86818	accurate	2.98387
Male	57	0.74	1.28	4.77	2.73	0.5	2.92	357	310	126	95.6	30.4	239.9	41	88	3.02909	accurate	3.33594
Male	47	0.8	1.1	5.86	1.22	0.82	3.3	2088	1466	130.6	92.8	37.8	83.9	115	161	4.48545	inaccurate	4.58182
Male	66	0.56	1.3	3.91	1.66	0.46	2.44	248	304	130.6	96.4	34.2	4.8	179	129	2.69545	accurate	2.65385
Male	53	0.68	1.16	5.6	1.48	0.78	3.33	845	828	134.8	102.8	32	91.9	164	144	4.14727	inaccurate	4.15517
Male	33	0.92	1.22	5.57	2.14	0.81	3.47	368	189	137.1	92.7	44.4	119.8	262	561	3.78727	accurate	3.90164
Female	44	0.56	2.19	12.65	6.93	0.24	3.01	974	666	137.9	102.9	35	95.6	497	142	9.26	inaccurate	5.66667
Female	57	1.1	0.82	9.2	2.02	0.74	3.23	869	308	138	87.9	50.1	146.3	129	199	7.54182	inaccurate	10.3171
Male	32	0.52	0.92	2.99	1.23	0.47	1.92	275	240	138.3	93.7	44.6	11.9	39	32	1.96091	accurate	2.73913
Male	61	0.87	2.02	16.04	4.14	0.49	5.47	2260	906	148.3	131.7	16.6	35.3	88	65	13.6682	accurate	7.69802
Female	76	1	0.79	3.58	1.05	1	2.1	1518	928	150.2	110.5	39.7	51.8	221	262	2.10273	accurate	3.26582
Male	63	1.48	0.87	5.4	1.51	1.39	3.08	1053	491	151.5	103	48.5	108.1	102	112	3.32364	accurate	4.6092
Female	42	0.63	1.21	4.8	2.24	0.52	2.72	385	492	154.2	115.4	38.8	144	101	162	3.26182	accurate	3.53719
Male	0	0.59	1.75	17.61	3.03	0.38	4.89	3686	383	167.2	113	54.2	283.7	250	283	15.8527	accurate	9.84571
Male	66	0.52	1.32	4.11	1.87	0.37	2.04	323	538	181	119	62	142.6	50	60	2.89	accurate	2.83333
Female	56	0.59	0.79	3.51	0.83	0.84	2.09	1012	518	185.5	125.1	60.4	53.7	41	42	2.29273	accurate	3.37975
Female	33	1.38	1.05	6	2	1.25	3.55	756	353	191.2	128.4	62.8	305	215	395	3.84091	accurate	4.52381
Male	35	0.71	0.73	3.2	1.38	0.86	1.9	232	192	194.5	88.4	106.1	95.7	57	25	1.71273	accurate	3.20548
Female	68	0.64	1.29	7.35	1.95	0.49	2.53	1839	419	197.3	135.6	61.7	117.7	199	86	5.97364	inaccurate	5.31783
Male	47	0.72	1.27	5.76	1.89	0.5	2.77	639	672	199	142.8	56.2	48.3	77	49	4.40091	inaccurate	4.14173
Female	50	0.47	1.69	7.54	2.06	0.38	5.29	188	204	205.4	160.3	45.1	200.9	57	79	6.22364	accurate	4.23669
Female	83	0.67	1.43	8.25	2.09	0.47	3.22	1017	601	217.1	154.1	63	75.5	135	146	6.83	inaccurate	5.44056
Female	49	0.33	0.62	3.23	0.78	0.53	2.51	274	155	230.3	130.6	99.7	126.6	129	145	2.34545	accurate	4.35484
Male	60	0.85	1.1	6.87	1.46	0.55	2.81	993	358	272.8	182.7	90.1	223.6	96	244	5.65636	inaccurate	5.74545
Male	53	0.36	2.27	11.55	4.05	0.21	1.86	428	641	358.5	236.8	121.7	38.4	292	165	9.49909	inaccurate	4.99559
Female	75	0.33	1.15	6.14	1.36	0.45	2.65	418	828	401.1	264.8	136.3	45.9	149	85	5.07182	inaccurate	4.94783

## Sheet: Chronic non-jaundice
Gender	Age	apoA1	apoB	TC	TG	HDL-C	LDL-C(D)	GGT	ALP	TB	DB	IB	TBA	AST	ALT	LDL-C(F)	Lipid testing	（TC-HDL-C)/APOB
Female	57	1.24	0.69	3.47	1	1.12	2.16	191	264	2.5	1.1	1.4	14.3	21	16	1.89545	accurate	3.4058
Female	57	1.31	0.86	4.23	0.95	1.28	2.82	292	280	2.6	1.2	1.4	9.9	34	20	2.51818	accurate	3.43023
Male	64	1.32	0.87	4.72	1.15	1.26	2.9	297	332	2.8	1.8	1	17.4	35	35	2.93727	accurate	3.97701
Female	53	0.88	0.94	4.01	1.33	0.87	2.65	234	313	2.9	1.3	1.6	65.8	33	61	2.53545	accurate	3.34043
Female	71	1.47	1.24	5.96	2.38	1.19	3.88	817	226	3.2	1.7	1.5	4.1	66	261	3.68818	accurate	3.84677
Female	51	1.21	0.85	4.03	1	1.18	2.55	144	198	3.2	1.4	1.8	1.4	26	38	2.39545	accurate	3.35294
Male	57	0.94	0.81	3.81	1.25	0.93	2.39	239	190	3.2	1.3	1.9	3.1	23	23	2.31182	accurate	3.55556
Female	47	1.9	0.98	6.24	2.39	2.05	3.37	272	185	3.5	2.1	1.4	24.7	75	53	3.10364	inaccurate	4.27551
Male	64	1.26	0.89	4.82	1.36	1.44	3.1	333	379	3.5	1.2	2.3	23.2	46	43	2.76182	accurate	3.79775
Female	58	0.95	0.76	3.7	0.83	0.9	2.43	335	410	3.6	2	1.6	32.5	50	21	2.42273	accurate	3.68421
Male	56	1.68	0.81	4.73	1.1	1.82	2.6	242	273	3.9	1.3	2.6	1.4	34	29	2.41	accurate	3.59259
Female	73	0.83	0.82	3.54	1.09	0.85	2.19	162	280	3.9	1.9	2	10.3	22	21	2.19455	accurate	3.28049
Male	65	0.88	0.76	2.92	0.83	0.76	1.95	212	199	4.2	2.3	1.9	1.7	22	55	1.78273	accurate	2.84211
Male	75	1.43	1.1	5.45	2.38	1.1	3.6	297	457	4.5	2.2	2.3	1.7	16	19	3.26818	inaccurate	3.95455
Male	61	1.51	1.06	5.32	0.82	1.58	3.6	396	287	4.5	2.9	1.6	5.1	33	19	3.36727	inaccurate	3.5283
Female	48	1.72	0.83	4.98	0.89	1.92	2.91	239	161	4.5	1.4	3.1	5.3	34	39	2.65545	accurate	3.68675
Female	73	1.13	0.86	4.24	1.64	1.06	2.56	318	271	4.5	2.4	2.1	2.3	25	23	2.43455	accurate	3.69767
Female	61	0.68	0.79	3.27	1.09	0.65	2.24	158	302	4.6	1.8	2.8	3.9	35	31	2.12455	accurate	3.31646
Female	47	1.38	0.72	3.87	0.98	1.19	2.48	178	257	4.7	2.5	2.2	4.7	63	35	2.23455	accurate	3.72222
Female	47	1.51	1.08	5.67	2.16	1.39	3.85	139	201	4.8	2.4	2.4	9.5	57	34	3.29818	inaccurate	3.96296
Male	59	0.78	0.97	4.24	0.57	0.94	3.28	194	189	4.8	2.9	1.9	4.3	18	38	3.04091	accurate	3.40206
Female	48	1.43	0.98	4.87	1.12	1.39	3.07	219	200	4.8	2.1	2.7	5.1	27	159	2.97091	accurate	3.55102
Female	69	1.52	0.8	4.1	1.35	1.62	2.2	151	165	4.8	1.4	3.4	2.2	26	46	1.86636	accurate	3.1
Female	47	1.77	0.93	5.61	1.13	2.05	3.43	344	228	4.9	2	2.9	8.6	79	58	3.04636	inaccurate	3.82796
Female	45	1.77	1.22	6.17	1.46	1.65	4.27	165	157	5	2.3	2.7	2.3	96	180	3.85636	inaccurate	3.70492
Male	63	0.75	0.68	3.22	0.7	0.91	1.95	420	296	5	2.8	2.2	6.5	62	41	1.99182	accurate	3.39706
Female	48	1.42	1.22	6.29	2.24	1.28	4.3	136	167	5.2	2.5	2.7	6	49	129	3.99182	inaccurate	4.10656
Female	71	1.03	0.78	4.21	0.58	1.53	2.09	228	198	5.2	3	2.2	6.1	24	32	2.41636	accurate	3.4359
Female	49	1.19	1.08	5.13	1.95	0.96	3.45	145	186	5.4	2.5	2.9	12	30	19	3.28364	inaccurate	3.86111
Female	67	1.43	1.33	7.02	0.79	1.61	5.18	280	278	5.5	2.6	2.9	3.2	74	87	5.05091	accurate	4.06767
Female	48	1.63	0.78	5.21	1.05	1.96	2.94	188	160	5.5	1.7	3.8	4.6	45	45	2.77273	accurate	4.16667
Female	58	0.94	0.71	3.43	0.66	0.97	2.25	213	345	5.5	2.6	2.9	3.9	17	9	2.16	accurate	3.46479
Female	48	1.87	0.96	5.96	1.1	2.02	3.62	230	153	5.7	3	2.7	5.5	55	42	3.44	accurate	4.10417
Male	79	1.1	1.25	5.68	1.24	1	4.36	395	237	5.8	2.9	2.9	11.7	34	16	4.11636	inaccurate	3.744
Female	60	1.54	1.13	5.71	1.9	1.48	3.81	161	167	5.8	2.5	3.3	2.9	25	20	3.36636	inaccurate	3.74336
Male	69	1.14	0.67	3.21	0.55	1.18	1.94	182	244	5.8	3.2	2.6	6.6	31	20	1.78	accurate	3.02985
Female	59	1.27	1.25	6.25	0.89	1.34	4.65	154	175	5.9	3.4	2.5	3.5	30	30	4.50545	accurate	3.928
Female	58	0.88	1.2	5.25	1.26	0.85	3.87	259	273	5.9	2.1	3.8	1.6	33	30	3.82727	accurate	3.66667
Male	66	1.04	1.16	5.23	1.75	0.9	3.42	274	232	5.9	2	3.9	20	34	14	3.53455	accurate	3.73276
Male	62	1.12	0.87	3.9	0.63	1.17	2.62	188	216	5.9	2.5	3.4	3.2	25	16	2.44364	accurate	3.13793
Female	56	2.5	1.29	8.17	1.38	2.82	5.31	146	194	6.1	2.1	4	8.9	66	48	4.72273	accurate	4.14729
Female	70	1.28	1.07	5.09	1.45	1.07	3.69	426	171	6.1	2	4.1	4.3	13	24	3.36091	inaccurate	3.75701
Male	55	1.3	0.61	3.35	0.87	1.22	1.85	237	196	6.1	2.5	3.6	76.1	65	85	1.73455	accurate	3.4918
Male	78	1.3	0.69	4.02	0.87	1.54	2.32	454	350	6.2	4.1	2.1	12.6	38	23	2.08455	accurate	3.5942
Female	61	1.08	1.39	6.2	1.72	1.09	4.55	139	169	6.3	1.7	4.6	1.7	19	20	4.32818	accurate	3.67626
Male	62	0.94	1.08	4.71	0.74	0.88	3.51	208	268	6.3	2.7	3.6	12.5	32	19	3.49364	accurate	3.5463
Female	54	1.23	1.56	7.15	1.35	1.21	5.5	493	371	6.5	2.3	4.2	2.4	41	27	5.32636	accurate	3.80769
Male	66	1.3	1.01	4.65	1.97	1.04	3.03	370	328	6.5	2.7	3.8	8.9	33	23	2.71455	accurate	3.57426
Male	62	1.1	0.79	3.71	0.43	1.18	2.47	183	206	6.5	2.7	3.8	4.3	31	15	2.33455	accurate	3.20253
Male	63	1.23	0.83	4.2	1.19	1.44	2.39	363	238	6.5	2.9	3.6	6.5	32	40	2.21909	accurate	3.3253
Male	53	1.05	1.17	5.62	1.44	0.97	3.9	620	349	6.6	2.1	4.5	5.1	39	16	3.99545	accurate	3.97436
Female	64	1	1.06	5.32	3.03	0.76	3.27	388	185	6.7	3.7	3	1.4	15	19	3.18273	accurate	4.30189
Female	67	1.72	1.43	7.69	1.05	1.89	5.55	418	324	6.8	2.4	4.4	7.8	89	79	5.32273	accurate	4.05594
Male	61	1.63	0.92	5.7	0.53	2.11	3.43	397	551	6.8	4.7	2.1	25.4	64	71	3.34909	inaccurate	3.90217
Male	59	0.73	0.94	3.9	1.63	0.58	2.62	270	197	6.8	2.8	4	9.1	41	16	2.57909	accurate	3.53191
Female	57	1.19	0.62	3.63	0.7	1.49	2.07	392	321	6.8	2.6	4.2	7	32	27	1.82182	accurate	3.45161
Female	58	1.18	1.18	5.26	1.09	1.06	3.64	181	195	6.9	2.2	4.7	1.5	32	18	3.70455	accurate	3.55932
Male	77	0.98	0.83	4.21	0.68	1.11	2.75	234	372	6.9	4.6	2.3	8.2	62	116	2.79091	accurate	3.73494
Female	55	1.2	1.69	7.71	2.85	0.98	5.54	443	185	7	1.9	5.1	4.1	53	29	5.43455	accurate	3.98225
Male	59	1.76	0.61	4.57	0.81	2.19	2.18	308	277	7	4.1	2.9	77.8	47	52	2.01182	accurate	3.90164
Male	65	0.96	0.8	3.67	1.17	1	2.09	573	419	7	3.1	3.9	2	36	31	2.13818	accurate	3.3375
Male	57	1.22	0.89	4.27	1.05	1.14	2.88	433	207	7.1	3.4	3.7	12.8	36	29	2.65273	accurate	3.51685
Male	45	0.95	0.85	3.81	0.63	0.91	2.79	268	216	7.1	3	4.1	2	29	25	2.61364	accurate	3.41176
Male	40	1.05	0.83	4.14	1.19	1.02	2.74	304	267	7.2	3	4.2	6.3	113	96	2.57909	accurate	3.75904
Female	58	0.88	1.28	5.2	1.63	0.82	3.59	317	267	7.3	2.5	4.8	2.2	27	11	3.63909	accurate	3.42188
Female	38	0.87	1.15	4.9	1.14	0.84	3.56	412	282	7.3	2.8	4.5	3.4	62	61	3.54182	accurate	3.53043
Male	57	1.04	0.77	3.64	0.78	1.09	2.41	992	646	7.4	3.2	4.2	3.5	17	18	2.19545	accurate	3.31169
Female	80	1.4	0.98	4.86	0.93	1.47	3.2	145	235	7.5	3.3	4.2	16.3	39	23	2.96727	accurate	3.45918
Female	60	0.96	0.99	3.99	1.17	0.77	2.86	176	178	7.6	2.8	4.8	6.3	34	34	2.68818	accurate	3.25253
Female	50	1.69	1.21	6.6	1.92	1.58	4.51	169	154	7.7	2.6	5.1	22	30	36	4.14727	accurate	4.14876
Male	79	1.08	1.03	4.45	0.95	1.13	3.09	254	189	7.7	3.5	4.2	3.3	53	24	2.88818	accurate	3.2233
Female	47	1.1	0.92	4.18	1.22	1.07	2.76	271	558	7.8	2.9	4.9	4.7	59	55	2.55545	accurate	3.38043
Male	57	1	0.83	3.95	0.84	1.04	2.62	938	522	7.8	3.9	3.9	1.6	15	15	2.52818	accurate	3.50602
Female	48	0.85	0.7	3.07	0.71	0.92	1.97	154	184	7.8	4.3	3.5	7.7	27	20	1.82727	accurate	3.07143
Male	72	1.21	1.48	6.03	3.09	0.85	4.06	231	188	8	2	6	10.3	31	24	3.77545	accurate	3.5
Female	57	0.82	0.61	3.13	0.82	0.84	1.95	404	346	8	3.8	4.2	6.8	14	13	1.91727	accurate	3.7541
Male	53	0.61	1.4	5.13	1.12	0.5	4.09	300	220	8.1	2.7	5.4	0.7	54	14	4.12091	accurate	3.30714
Female	60	1.25	1.18	5.74	2.19	1.14	3.98	163	250	8.1	3.5	4.6	2.4	15	9	3.60455	accurate	3.89831
Female	58	0.94	1.06	4.66	1.21	0.89	3.22	340	352	8.1	3.4	4.7	7	39	15	3.22	accurate	3.5566
Female	58	1.01	0.81	3.78	0.93	1.01	2.6	172	291	8.1	3.3	4.8	4.1	14	10	2.34727	accurate	3.41975
Male	65	1.64	1.27	7.64	4.25	1.3	4.14	828	262	8.2	4.2	4	18.3	46	45	4.40818	accurate	4.99213
Male	58	0.9	0.71	3.07	1.14	0.76	1.98	464	422	8.2	3.6	4.6	6.3	81	39	1.79182	accurate	3.25352
Female	55	0.64	1.6	6.04	2.35	0.64	3.99	157	233	8.3	3.1	5.2	5	14	7	4.33182	inaccurate	3.375
Male	63	1.48	1.15	6.05	1.3	1.57	3.96	606	238	8.3	3.3	5	5.8	18	36	3.88909	accurate	3.89565
Female	51	1.45	0.81	4.68	1.48	1.38	2.77	140	196	8.3	2.5	5.8	3.4	41	35	2.62727	accurate	4.07407
Female	56	2.24	0.94	6.75	0.91	2.64	3.84	188	350	8.5	6.1	2.4	18.4	59	47	3.69636	accurate	4.37234
Male	40	0.99	0.87	4.2	0.96	1	2.84	215	210	8.5	3.8	4.7	12.7	67	55	2.76364	accurate	3.67816
Female	58	1.41	0.58	3.68	0.59	1.52	1.97	926	721	8.5	4.4	4.1	10.2	81	59	1.89182	accurate	3.72414
Female	56	1.3	0.77	5.22	0.74	1.97	3.1	608	494	8.6	4	4.6	33.5	43	51	2.91364	accurate	4.22078
Female	67	1.16	1.42	6.92	0.99	1.32	5.34	389	435	8.7	3.9	4.8	5.1	62	28	5.15	accurate	3.94366
Male	61	0.84	0.88	4.1	0.85	0.87	3.08	430	341	8.9	4	4.9	5.4	33	35	2.84364	accurate	3.67045
Female	61	1.4	0.8	4.53	0.71	1.63	2.82	136	189	8.9	3.8	5.1	18.7	40	22	2.57727	accurate	3.625
Female	58	1.52	0.61	4.13	0.97	1.67	2.32	480	573	8.9	4.1	4.8	9.5	21	17	2.01909	accurate	4.03279
Male	59	1.75	0.66	4.84	0.85	2.33	2.27	281	213	8.9	4.7	4.2	12.1	22	21	2.12364	accurate	3.80303
Male	69	1.57	0.63	4.1	0.8	1.85	1.95	386	317	8.9	4.2	4.7	2.5	56	35	1.88636	accurate	3.57143
Female	73	2.22	1.49	8.96	0.96	2.3	6.61	681	189	9.1	4.1	5	10.1	101	157	6.22364	accurate	4.4698
Female	56	1.26	0.89	4.54	1.21	1.41	2.85	771	410	9.1	5.9	3.2	2.4	31	27	2.58	accurate	3.51685
Female	47	1.4	1.12	5.51	2.1	1.22	3.8	163	200	9.2	3.2	6	50	50	47	3.33545	inaccurate	3.83036
Female	65	1.09	1.02	4.51	1.81	0.84	3.04	293	175	9.2	4.5	4.7	2.1	46	24	2.84727	accurate	3.59804
Male	59	1.73	0.69	5.73	1	2.47	2.82	468	222	9.2	4.8	4.4	42	65	61	2.80545	accurate	4.72464
Male	46	0.98	1.6	6.87	3.84	0.81	4.27	878	1762	9.3	6.9	2.4	17.5	62	35	4.31455	accurate	3.7875
Male	62	1.03	0.86	4.05	0.63	1.05	2.66	214	236	9.3	4.4	4.9	4.5	24	13	2.71364	accurate	3.48837
Female	62	0.84	0.92	4.33	0.8	1.2	2.89	201	304	9.4	4.7	4.7	23.3	26	24	2.76636	accurate	3.40217
Male	59	1.37	0.61	3.9	0.74	1.72	2.17	389	245	9.5	6.9	2.6	22.1	48	69	1.84364	accurate	3.57377
Female	47	1.51	1.1	5.42	1.73	1.41	3.8	208	221	9.6	2.2	7.4	10.1	59	52	3.22364	inaccurate	3.64545
Female	48	1.08	1.34	5.22	2	0.91	3.78	138	189	9.6	2.6	7	12	53	38	3.40091	accurate	3.21642
Female	67	1.74	1.53	8.15	1.12	2.04	5.9	452	364	9.7	2.5	7.2	5.4	63	49	5.60091	accurate	3.99346
Female	47	1.36	1.2	5.43	1.93	1.23	3.84	311	380	9.7	3	6.7	14	60	49	3.32273	inaccurate	3.5
Female	63	0.7	1.26	5.17	1.07	0.73	4.01	216	173	9.8	4.1	5.7	7.3	41	15	3.95364	accurate	3.52381
Female	47	1.35	0.69	3.58	0.93	1.25	1.91	242	329	9.8	4.4	5.4	7.3	309	193	1.90727	accurate	3.37681
Female	49	0.73	1.15	4.31	1.44	0.53	2.86	260	307	10	4	6	6.4	156	51	3.12545	accurate	3.28696
Female	61	1.57	1.31	6.5	2.12	1.33	4.48	636	156	10.2	3.2	7	15.9	156	221	4.20636	accurate	3.94656
Female	48	0.97	1.25	5.02	2.37	0.76	3.45	168	198	10.3	2.5	7.8	12.3	54	45	3.18273	inaccurate	3.408
Male	65	1.34	0.98	4.94	1.74	1.18	3.07	277	218	10.3	4.3	6	3.4	28	19	2.96909	accurate	3.83673
Female	50	0.85	0.94	3.95	1.12	0.82	2.67	260	166	10.3	4.7	5.6	6	31	15	2.62091	accurate	3.32979
Female	56	0.94	0.92	3.75	1.28	0.81	2.46	209	171	10.3	4.8	5.5	11.8	75	49	2.35818	accurate	3.19565
Female	60	1.18	1.3	5.11	1.4	0.96	3.65	197	182	10.4	4	6.4	1.5	52	30	3.51364	accurate	3.19231
Female	56	1.62	0.82	6.61	0.57	2.83	3.72	335	433	10.5	5.5	5	31.7	42	45	3.52091	accurate	4.60976
Female	29	0.49	1.12	4.25	1.08	0.49	3.15	136	254	10.5	5.7	4.8	15.1	43	12	3.26909	accurate	3.35714
Female	57	1.09	0.93	5.05	1.27	1.31	3.1	287	291	10.5	5.3	5.2	28.5	51	49	3.16273	accurate	4.02151
Female	73	1.13	0.51	3.99	1.26	1.4	1.99	398	280	10.5	5.3	5.2	19.6	95	110	2.01727	accurate	5.07843
Female	47	1.32	1.16	4.89	2	1.15	3.44	204	235	10.6	3.5	7.1	27.7	71	50	2.83091	inaccurate	3.22414
Male	41	0.17	1.63	6.41	2.6	0.18	4.07	259	250	10.7	3.2	7.5	17	287	36	5.04818	inaccurate	3.82209
Female	28	0.56	1.49	5.59	1.85	0.46	3.75	209	321	10.7	5.9	4.8	18.3	74	21	4.28909	inaccurate	3.44295
Male	54	0.83	1.03	4.38	0.89	0.71	3.07	204	224	10.7	5.8	4.9	13.8	43	9	3.26545	accurate	3.56311
Female	57	0.9	0.82	4.27	0.77	1.11	2.67	232	240	10.7	4.7	6	12.9	47	35	2.81	accurate	3.85366
Male	59	1.84	0.6	4.76	0.78	2.46	2.16	249	219	10.8	5.6	5.2	20.1	41	51	1.94545	accurate	3.83333
Female	67	1.15	1.49	7.09	1.04	1.16	5.46	420	401	10.9	4.3	6.6	2.4	83	42	5.45727	accurate	3.97987
Female	68	1.47	0.73	4.27	0.96	1.69	2.45	164	213	10.9	3.4	7.5	3.5	178	218	2.14364	accurate	3.53425
Female	64	1.62	0.63	4.18	0.79	1.94	2.05	242	208	10.9	4.4	6.5	5.9	76	48	1.88091	accurate	3.55556
Male	52	1.54	0.62	3.78	1.45	1.62	1.81	261	524	11.1	5.5	5.6	10.7	66	49	1.50091	accurate	3.48387
Male	69	0.72	1.12	4.74	0.78	0.67	3.56	263	225	11.2	6.4	4.8	3.5	98	29	3.71545	accurate	3.63393
Female	69	1.07	0.89	4.42	1.16	0.98	3.1	1173	415	11.2	5.3	5.9	2.8	99	152	2.91273	accurate	3.86517
Male	48	0.79	1.36	6.03	1.42	0.67	4.77	748	479	11.3	5.9	5.4	57.3	99	127	4.71455	accurate	3.94118
Male	59	1.69	1.07	6.95	1.33	2.2	4.18	717	203	11.3	6.8	4.5	17.8	42	44	4.14545	accurate	4.43925
Male	53	1.08	1	4.07	1.26	0.97	2.56	570	504	11.3	5.6	5.7	3.1	121	30	2.52727	accurate	3.1
Female	55	1.19	2.11	8.76	2.45	1.1	6.67	232	417	11.4	4.5	6.9	2.5	83	26	6.54636	accurate	3.63033
Male	61	1.13	0.97	4.96	1.4	1.05	3.42	1266	477	11.4	5.9	5.5	3.9	49	8	3.27364	inaccurate	4.03093
Female	68	1.41	1.86	8.73	1.23	1.56	6.7	511	505	11.6	4.7	6.9	4.3	77	33	6.61091	accurate	3.85484
Male	64	0.59	1.34	5.61	1.46	0.58	4.21	238	230	11.6	5.6	6	5.6	76	30	4.36636	accurate	3.75373
Male	59	1.73	0.8	6.69	0.84	2.87	3.43	712	252	11.6	8.1	3.5	54.9	58	69	3.43818	accurate	4.775
Male	71	1.07	1.07	5.33	0.83	1.11	4.02	371	212	11.7	4.1	7.6	25.1	87	83	3.84273	accurate	3.94393
Male	66	0.84	0.92	3.88	1.24	0.8	2.71	335	265	11.8	6.6	5.2	6.8	45	20	2.51636	accurate	3.34783
Female	66	0.88	0.74	3.43	1.61	0.79	2.13	298	182	11.8	6.9	4.9	5.7	44	20	1.90818	accurate	3.56757
Female	28	0.61	1.75	6.01	1.73	0.49	4.33	201	291	12	6	6	15.3	75	16	4.73364	accurate	3.15429
Male	41	0.13	1.54	5.62	2.23	0.18	3.92	203	237	12	3.1	8.9	4.9	128	48	4.42636	inaccurate	3.53247
Male	59	1.96	0.73	6.08	0.71	3.14	2.9	183	197	12	6.5	5.5	38.5	29	32	2.61727	accurate	4.0274
Male	55	0.92	0.78	3.35	0.65	1	2.23	423	235	12.1	5.8	6.3	4.8	26	19	2.05455	accurate	3.01282
Male	57	1.39	0.89	4.92	1.23	1.52	3.13	818	266	12.3	5.6	6.7	17.7	75	64	2.84091	accurate	3.82022
Male	73	0.59	0.92	3.31	1.37	0.53	2.16	317	469	12.3	6.7	5.6	5.5	91	27	2.15727	accurate	3.02174
Female	28	0.66	1.57	5.3	1.73	0.48	3.72	140	199	12.4	5.8	6.6	6.8	77	15	4.03364	accurate	3.07006
Male	71	0.58	1.04	3.95	1.39	0.54	2.75	368	240	12.4	5.3	7.1	8.1	33	26	2.77818	accurate	3.27885
Male	59	1.75	0.81	6.28	0.85	2.67	3.28	547	201	12.6	6.6	6	50.4	73	76	3.22364	accurate	4.45679
Male	67	0.98	1.11	4.8	1.39	0.84	3.27	471	323	12.8	8.9	3.9	1.4	32	22	3.32818	accurate	3.56757
Male	57	1.38	0.7	4.51	1.21	1.58	2.33	757	227	12.8	8.5	4.3	41	70	59	2.38	accurate	4.18571
Female	70	1.08	0.82	4.32	0.71	1.3	2.87	170	184	13.1	6.7	6.4	14.6	45	26	2.69727	accurate	3.68293
Male	62	1.2	0.69	3.58	0.57	1.3	2	490	275	13.1	7.3	5.8	16.4	115	122	2.02091	accurate	3.30435
Female	73	1.39	0.73	3.79	0.67	1.33	2.36	245	184	13.2	4.2	9	5.4	28	18	2.15545	accurate	3.36986
Female	62	1.52	0.51	4.32	0.96	2.07	1.87	277	201	13.2	7.9	5.3	13.6	107	116	1.81364	accurate	4.41176
Female	62	1.05	0.77	3.34	1.06	0.93	1.98	156	260	13.3	9.7	3.6	16	62	49	1.92818	accurate	3.12987
Male	49	0.76	1.96	8.1	1.64	0.71	6.33	292	286	13.5	7	6.5	9.1	175	31	6.64455	accurate	3.77041
Female	57	0.92	0.93	4.82	0.67	1.07	3.14	316	349	13.8	6.6	7.2	18.8	56	32	3.44545	inaccurate	4.03226
Male	67	0.9	0.88	4.41	1.38	1.09	2.67	397	413	14.3	8.9	5.4	14.9	20	27	2.69273	accurate	3.77273
Female	67	1.56	1.87	8.29	1.15	1.27	6.64	186	164	14.5	5.8	8.7	1.7	33	18	6.49727	accurate	3.75401
Female	67	1.03	1.57	7.29	1.3	1.1	5.33	342	397	14.5	5.9	8.6	4	51	31	5.59909	accurate	3.94268
Female	55	0.95	0.82	3.65	1.11	0.87	2.47	247	186	14.7	5.3	9.4	4.2	38	8	2.27545	accurate	3.39024
Male	54	1.65	0.63	4.26	1.5	1.83	1.91	1119	361	14.7	9.6	5.1	15.2	453	536	1.74818	accurate	3.85714
Male	56	1.52	1.17	5.93	1.41	1.51	4	263	256	14.9	8.1	6.8	28.5	71	112	3.77909	accurate	3.77778
Male	56	0.91	0.78	3.73	0.83	1.04	2.33	391	224	14.9	7.5	7.4	2.6	69	51	2.31273	accurate	3.44872
Male	56	0.85	0.87	4.08	1.55	0.69	2.7	365	242	15	8.1	6.9	6.2	72	49	2.68545	accurate	3.89655
Male	57	1.32	0.86	5.18	0.92	1.72	3.31	826	271	15.1	8.5	6.6	44.4	97	72	3.04182	accurate	4.02326
Female	57	0.78	1.08	4.8	1.69	0.71	3.18	222	338	15.3	7.1	8.2	9.4	67	37	3.32182	accurate	3.78704
Female	70	1.1	0.86	4.12	0.99	1.2	2.59	238	252	15.3	10.8	4.5	11.1	46	26	2.47	accurate	3.39535
Male	50	0.97	0.62	3.38	0.79	1.15	1.97	319	362	15.3	7.6	7.7	25.5	112	58	1.87091	accurate	3.59677
Male	75	1.01	1.17	5.57	0.99	1.16	4.1	550	298	15.4	8.4	7	12.6	52	31	3.96	accurate	3.76923
Female	61	1.53	1.42	7.95	3.82	1.24	4.85	2444	505	15.5	8.2	7.3	26.7	184	221	4.97364	accurate	4.72535
Male	63	1.01	0.92	3.97	1.3	0.87	2.68	211	388	15.9	7.7	8.2	7.2	29	12	2.50909	accurate	3.36957
Male	77	1.18	1.08	5.08	1.16	1.26	3.46	226	214	16	9	7	9.9	43	51	3.29273	inaccurate	3.53704
Male	61	1.3	0.87	4.52	1.03	1.31	2.85	334	269	16.1	6.4	9.7	3.4	43	25	2.74182	accurate	3.68966
Female	55	0.71	1.07	4.03	1.31	0.62	2.44	181	374	16.2	7.1	9.1	1.7	38	31	2.81455	accurate	3.18692
Male	57	1.38	0.74	5.09	1.11	1.8	2.81	927	236	16.4	10.1	6.3	55.2	96	75	2.78545	accurate	4.44595
Male	79	0.47	0.79	2.94	0.94	0.47	1.96	310	290	16.4	9.6	6.8	9.5	59	22	2.04273	accurate	3.12658
Male	67	0.79	0.97	3.76	2.24	0.54	2.33	351	205	16.6	9.8	6.8	3.2	16	36	2.20182	accurate	3.31959
Female	71	0.69	2.15	8.15	2.24	0.61	6.11	238	477	16.7	6.5	10.2	4.1	89	33	6.52182	accurate	3.50698
Male	62	0.6	0.83	2.96	1.26	0.46	1.87	319	320	16.7	11.1	5.6	10.1	58	24	1.92727	accurate	3.01205
Female	57	0.63	1.05	4.08	3.05	0.46	2.25	176	339	16.8	8.9	7.9	7.8	94	28	2.23364	accurate	3.44762
Male	77	0.87	1.53	5.96	1.81	0.79	4.13	379	216	17.1	9.8	7.3	1	87	17	4.34727	inaccurate	3.37908
Male	85	1.47	1.09	5.48	0.7	1.58	3.72	414	244	17.1	11.5	5.6	1	30	32	3.58182	accurate	3.57798
Female	47	1.42	1.09	5.19	1.8	1.28	3.62	175	177	17.1	5.4	11.7	13.7	59	38	3.09182	inaccurate	3.58716
Male	56	0.84	0.8	3.4	0.84	0.81	2.52	341	372	17.5	9	8.5	27.8	120	76	2.20818	accurate	3.2375
Female	32	0.58	1.01	3.64	1.48	0.45	2.47	188	286	17.5	9.8	7.7	6.2	82	98	2.51727	accurate	3.15842
Male	42	0.84	1.17	5.17	0.93	0.71	4.09	337	193	17.6	7.5	10.1	6.4	107	20	4.03727	accurate	3.81197
Male	42	0.62	1.11	4.56	1.01	0.62	3.29	462	271	17.6	11.2	6.4	15.4	166	24	3.48091	inaccurate	3.54955
Male	63	0.91	0.73	3.19	0.85	0.93	2.01	460	262	17.7	12	5.7	23.6	45	25	1.87364	accurate	3.09589
Male	75	0.76	1.04	4.05	1.38	0.76	2.49	587	238	18.1	10.6	7.5	1.3	84	60	2.66273	accurate	3.16346
Female	66	0.6	0.9	3.51	1.7	0.62	1.86	251	177	18.1	10.8	7.3	8.4	42	13	2.11727	accurate	3.21111
Male	40	0.94	0.88	4.18	0.9	0.97	2.98	256	190	18.4	8.4	10	3.4	64	80	2.80091	accurate	3.64773
Female	62	0.8	0.84	3.89	0.7	0.9	2.92	146	157	18.5	9.4	9.1	139.4	71	23	2.67182	accurate	3.55952
Male	57	1.32	0.73	4.43	0.8	1.69	2.68	242	270	18.5	9.3	9.2	11	71	40	2.37636	accurate	3.75342
Male	76	0.76	0.71	3.31	0.7	0.84	2.13	461	220	18.5	9.7	8.8	15.6	57	25	2.15182	accurate	3.47887
Female	59	0.92	1.1	5.23	1.4	0.92	3.77	166	156	18.6	7.5	11.1	2.2	48	78	3.67364	accurate	3.91818
Male	53	0.67	2.88	12.45	3.78	0.48	9.54	363	277	18.8	10.2	8.6	8.2	147	52	10.2518	accurate	4.15625
Male	57	1.41	0.57	4.09	1.05	2.14	1.84	624	249	18.8	6.9	11.9	52.5	104	108	1.47273	accurate	3.42105
Male	88	0.96	1.2	5.98	1.15	1.03	4.3	248	198	19.2	10.7	8.5	6.6	59	28	4.42727	accurate	4.125
Male	57	1.07	0.75	3.93	0.95	1.13	2.3	847	560	19.2	12.2	7	58.2	180	103	2.36818	accurate	3.73333
Male	52	0.79	0.92	4.05	1.12	0.78	2.77	185	639	19.4	12.1	7.3	33.3	188	103	2.76091	accurate	3.55435
Male	66	1	1.4	5.9	1.52	0.82	4.57	512	230	19.5	8.4	11.1	19.2	35	23	4.38909	accurate	3.62857
Male	56	0.85	0.9	3.74	0.99	0.75	2.72	394	328	19.9	11.3	8.6	16.6	113	68	2.54	accurate	3.32222
Male	62	0.79	0.93	4.15	0.71	0.75	3.17	356	229	20.1	8.8	11.3	1.7	120	53	3.07727	accurate	3.65591
Female	59	0.81	0.79	3.82	0.93	0.92	2.33	571	687	20.2	12.8	7.4	6.8	90	39	2.47727	accurate	3.67089
Male	64	1.57	0.57	3.93	0.81	1.92	1.9	188	209	20.2	12.1	8.1	21.6	65	43	1.64182	accurate	3.52632
Male	60	0.62	0.98	4.5	0.8	0.68	3.43	274	369	20.3	8	12.3	20.6	278	32	3.45636	accurate	3.89796
Female	64	1.4	0.87	5.3	2.71	1.28	2.91	965	421	20.4	11.7	8.7	2.6	142	432	2.78818	accurate	4.62069
Male	48	0.88	1.01	4.18	1.52	0.71	2.99	333	322	20.9	12.5	8.4	4.9	39	32	2.77909	accurate	3.43564
Female	60	1.31	0.86	4.11	1.12	1.25	2.71	275	246	21	11.6	9.4	8.6	200	33	2.35091	accurate	3.32558
Male	56	1.26	1.24	5.85	1.52	1.27	4.18	262	233	21.5	11.4	10.1	8	31	31	3.88909	inaccurate	3.69355
Male	78	1.25	0.71	3.75	0.78	1.46	2.16	649	503	21.6	14.6	7	13	58	32	1.93545	accurate	3.22535
Female	72	0.73	0.93	5.79	0.84	1	3.18	330	912	22.1	14.6	7.5	22.3	82	47	4.40818	inaccurate	5.15054
Male	60	0.62	0.7	2.96	0.68	0.61	1.91	332	326	22.3	14.4	7.9	15.3	167	70	2.04091	accurate	3.35714
Male	72	1.14	1.38	6.17	1.41	1.15	4.61	535	384	22.9	14.1	8.8	41.7	77	45	4.37909	accurate	3.63768
Male	51	0.38	0.85	2.72	0.81	0.36	2.12	356	224	22.9	14.4	8.5	20	454	422	1.99182	accurate	2.77647
Male	67	1.77	0.78	4.78	1.8	1.55	2.69	803	265	23	11.9	11.1	11.8	35	35	2.41182	accurate	4.14103
Male	54	0.56	1.53	5.77	1.13	0.45	4.74	618	556	23.1	12.3	10.8	4.7	69	20	4.80636	accurate	3.47712
Male	47	0.78	1.66	7.07	1.16	0.65	5.88	365	249	23.2	12.7	10.5	35.6	247	125	5.89273	accurate	3.86747
Male	77	0.71	1.26	4.83	1.62	0.7	3.41	360	217	23.4	14.3	9.1	17.6	156	23	3.39364	accurate	3.27778
Male	72	1.12	1.01	4.23	1.29	1.08	2.8	521	359	23.5	15.8	7.7	63.1	104	49	2.56364	accurate	3.11881
Female	28	0.65	1.44	5.39	1.4	0.54	3.93	216	305	23.6	12.4	11.2	29.5	79	23	4.21364	inaccurate	3.36806
Male	68	1.27	1.28	5.82	1.02	1.58	3.91	344	340	25	14.5	10.5	9.2	31	22	3.77636	accurate	3.3125
Female	59	0.76	1.02	4.17	1.6	0.77	2.57	398	658	25.1	23.2	1.9	1.9	30	60	2.67273	accurate	3.33333
Male	56	0.71	2.28	9.94	2.05	0.52	7.56	302	260	25.5	13.7	11.8	18.8	199	43	8.48818	accurate	4.13158
Female	76	0.95	0.91	3.65	0.92	0.77	2.36	647	420	25.7	16.1	9.6	9.8	215	43	2.46182	accurate	3.16484
Male	46	0.63	1.02	4.1	0.74	0.63	3.21	407	288	26.1	14.4	11.7	5.2	122	35	3.13364	accurate	3.40196
Male	62	1.04	0.95	5.08	0.91	1.2	3.54	491	356	26.3	12.6	13.7	17	114	42	3.46636	accurate	4.08421
Female	54	1.4	0.86	4.74	0.89	1.52	3	751	574	27.1	19.6	7.5	10	147	143	2.81545	accurate	3.74419
Male	52	1.16	1.22	6.35	0.83	1.44	4.67	348	405	27.4	18	9.4	18.3	64	50	4.53273	accurate	4.02459
Female	62	1.1	1	4.98	2.42	0.97	3.24	762	313	27.6	19.6	8	138.7	216	105	2.91	accurate	4.01
Male	43	0.71	0.85	3.48	1.04	0.7	2.47	338	243	27.6	19.3	8.3	13.8	180	121	2.30727	accurate	3.27059
Male	65	1.43	0.74	4.38	0.53	1.92	2.4	552	377	27.9	19.9	8	16.9	46	54	2.21909	accurate	3.32432
Male	51	0.77	0.93	3.78	1.06	0.64	2.81	284	189	28.1	14	14.1	11.1	48	29	2.65818	accurate	3.37634
Female	55	0.83	1.72	7.35	2.64	0.68	4.86	234	551	28.4	13.2	15.2	33.6	1252	168	5.47	accurate	3.87791
Female	77	0.98	1.56	6.22	2.92	1.19	3.77	755	1864	28.7	16.4	12.3	7.8	56	36	3.70273	accurate	3.22436
Female	67	0.62	1.25	5.48	0.86	0.55	4.38	224	328	29	18.2	10.8	34.6	119	36	4.53909	accurate	3.944
Male	54	0.64	1.07	3.89	1.34	0.57	2.39	675	368	29.4	20.5	8.9	13.9	72	12	2.71091	accurate	3.1028
Male	58	1.18	0.69	3.46	1.14	1.19	1.86	523	281	30.9	24.4	6.5	5.4	34	47	1.75182	accurate	3.28986
Female	56	0.79	2.31	8.71	3.09	0.53	6.43	317	593	31.5	19.6	11.9	57.8	77	5	6.77545	accurate	3.54113
Male	57	1.33	0.72	4.45	0.87	1.78	2.61	259	274	32	18.8	13.2	8.5	79	44	2.27455	accurate	3.70833
Female	72	0.75	0.75	6.12	0.79	1.09	2.59	376	872	32.4	25.8	6.6	26.5	54	29	4.67091	inaccurate	6.70667
Male	62	1.14	0.77	4.05	0.82	1.39	2.46	512	551	34.3	20.8	13.5	25.2	51	23	2.28727	accurate	3.45455
Male	49	0.8	1.34	5.97	2.14	0.74	4.14	208	368	34.9	18.1	16.8	4.3	37	38	4.25727	accurate	3.90299
Male	37	0.44	2.89	12.26	1.94	0.35	10.04	215	199	35	16.7	18.3	27.4	169	41	11.0282	accurate	4.12111
Male	62	1.46	1.41	6.88	1.73	1.53	4.81	296	237	35.3	26.3	9	8.4	34	80	4.56364	accurate	3.79433
Female	60	0.58	0.91	3.26	0.92	0.46	2.44	232	431	36.4	23.9	12.5	28.7	166	35	2.38182	accurate	3.07692
Male	58	1.15	0.66	3.86	0.76	1.79	1.94	1626	1429	38.3	24.1	14.2	94.2	36	53	1.72455	accurate	3.13636
Male	42	0.77	0.96	5.68	2.2	0.46	2	1124	>1319	39.7	29	10.7	>162.1	501	503	4.22	inaccurate	5.4375
Female	72	0.79	0.82	6.01	0.85	1.21	2.99	462	1111	41.5	29.2	12.3	49.5	92	60	4.41364	inaccurate	5.85366
Male	59	0.64	0.9	3.96	0.73	0.62	2.94	264	265	43.2	30.7	12.5	38.7	147	66	3.00818	accurate	3.71111
Female	72	0.68	1.02	10.21	0.81	0.91	4.07	335	1238	44.7	32	12.7	46.1	54	23	8.93182	inaccurate	9.11765
Male	52	0.76	1.15	5.42	1.2	0.94	3.67	288	362	45.1	33	12.1	7.2	54	52	3.93455	accurate	3.89565
Female	58	0.98	0.98	5.02	0.74	1.25	3.23	658	768	46.4	34.6	11.8	37.5	75	58	3.43364	inaccurate	3.84694
Female	70	0.88	0.76	3.56	2.26	0.69	1.94	440	153	46.7	31.1	15.6	175.3	130	139	1.84273	accurate	3.77632
Female	58	1.35	1.63	7.65	1.37	1.22	5.94	211	183	47.8	35	12.8	4.2	51	20	5.80727	accurate	3.94479
Female	79	0.84	0.67	3.1	0.77	0.91	1.94	301	168	47.8	29.4	18.4	34.1	173	88	1.84	accurate	3.26866
Male	53	0.5	3.45	15.73	1.77	0.41	13.35	712	544	48.9	31.3	17.6	69.2	306	122	14.5155	accurate	4.44058
Female	44	1.08	1.12	5.4	1.01	1.18	3.45	876	223	50.1	33.6	16.5	60.2	146	121	3.76091	accurate	3.76786
Male	46	0.58	1.51	6.56	1.24	0.73	4.93	857	553	50.2	32	18.2	37.8	198	54	5.26636	accurate	3.86093

## Sheet: acute non-jaundice
Gender	Age	apoA1	apoB	TC	TG	HDL-C	LDL-C(D)	GGT	ALP	TB	DB	IB	TBA	AST	ALT	LDL-C(F)	Lipid testing	（TC-HDL-C)/APOB
Male	61	1.44	0.96	5.41	1.26	1.79	3.24	355	216	2	1.9	0.1	14.2	25	30	3.04727	accurate	3.77083
Female	60	1.84	2.46	11.18	7.19	1.08	7.06	320	287	2.1	1.3	0.8	12.7	85	44	6.83182	accurate	4.10569
Female	57	1.74	0.77	4.77	2.19	1.54	2.47	292	178	2.1	1.5	0.6	17.1	29	29	2.23455	accurate	4.19481
Male	61	1.67	0.97	5.63	1.01	1.92	3.33	444	285	2.2	2.1	0.1	6.8	26	35	3.25091	accurate	3.82474
Female	74	1.23	1.21	5.73	3.91	0.87	3.33	270	178	2.3	1	1.3	5.6	29	31	3.08273	accurate	4.01653
Female	53	1.87	1.07	6.1	1.03	2.1	3.75	250	179	2.6	2.1	0.5	5	35	55	3.53182	accurate	3.73832
Male	47	1.12	1.4	6.46	3.29	0.77	4.17	1095	352	2.7	1.8	0.9	2.7	21	14	4.19455	accurate	4.06429
Female	65	1.62	1.16	6.01	3.54	1.22	3.64	684	267	2.7	1.9	0.8	14.1	57	104	3.18091	inaccurate	4.12931
Female	75	1.34	0.69	3.55	1.27	1.08	2.1	364	219	3	1.5	1.5	2.9	31	58	1.89273	accurate	3.57971
Female	59	0.96	0.85	3.54	1.85	0.72	2.29	147	151	3.1	1.3	1.8	7.2	21	39	1.97909	accurate	3.31765
Male	61	1.58	1.77	8.75	2.49	1.17	6.17	499	334	3.2	2.1	1.1	10	29	19	6.44818	accurate	4.28249
Female	67	1.77	1.08	6.66	2.88	1.68	3.68	353	195	3.4	1.9	1.5	5.3	16	26	3.67091	accurate	4.61111
Female	35	1.35	0.92	4.66	1.17	1.51	3.13	183	286	3.5	1.6	1.9	13.6	33	99	2.61818	accurate	3.42391
Female	65	1.54	0.69	4.14	4.06	1.15	1.9	882	274	3.5	2.2	1.3	16.1	62	94	1.14455	accurate	4.33333
Female	62	1.68	1.01	5.28	2.21	1.33	3.31	442	190	3.6	1.3	2.3	1.1	51	38	2.94545	accurate	3.91089
Male	55	0.89	1.09	4.66	3.83	0.56	2.82	322	200	3.6	2.3	1.3	1.3	15	24	2.35909	accurate	3.76147
Female	35	1.2	0.74	4.12	1.23	1.41	2.21	220	322	3.6	2.8	0.8	2.1	44	137	2.15091	accurate	3.66216
Female	67	1.71	0.92	5.08	1.91	1.57	2.76	190	188	3.7	1.8	1.9	3.7	14	17	2.64182	accurate	3.81522
Female	66	1.63	0.79	4.15	1.05	1.51	2.42	214	241	3.7	2.6	1.1	4.4	34	32	2.16273	accurate	3.34177
Male	35	1.33	1.2	5.43	6.81	0.81	2.41	241	188	3.7	0.7	3	2.7	21	18	1.52455	accurate	3.85
Male	51	1.05	0.68	3.45	0.84	1.03	2.12	185	193	3.8	2.1	1.7	7.6	53	45	2.03818	accurate	3.55882
Male	69	0.94	0.76	3.3	0.57	0.91	2.26	393	339	3.9	2.4	1.5	7.1	17	11	2.13091	accurate	3.14474
Female	57	1.5	0.68	3.99	1.27	1.3	2.14	197	173	4	2.5	1.5	3.6	23	13	2.11273	accurate	3.95588
Female	69	0.77	1	3.65	1.67	0.75	1.91	268	228	4	1.8	2.2	14.8	81	16	2.14091	accurate	2.9
Female	66	1.92	0.98	5.64	2.01	1.76	3.38	328	198	4.2	2	2.2	3	17	21	2.96636	inaccurate	3.95918
Female	67	1.48	0.9	4.94	1.89	1.42	2.8	169	183	4.2	1.6	2.6	5.3	11	13	2.66091	accurate	3.91111
Female	58	1.46	1.36	7.18	1.36	1.44	5.04	234	271	4.4	1.8	2.6	2.3	35	36	5.12182	accurate	4.22059
Female	67	1.66	1.09	6.31	2.73	1.54	3.72	243	162	4.4	1.6	2.8	2.3	18	18	3.52909	accurate	4.37615
Female	61	1.59	1.42	7.38	1.93	1.56	5.45	141	170	4.5	2.1	2.4	8.5	20	34	4.94273	accurate	4.09859
Male	55	0.93	0.79	3.27	0.68	0.9	2.23	265	196	4.5	1.1	3.4	2.8	26	31	2.06091	accurate	3
Female	67	1.49	1.17	6.21	2.57	1.32	4	259	165	4.6	2.1	2.5	2.8	17	17	3.72182	accurate	4.17949
Female	67	2.17	0.93	5.49	1.04	2.1	3.2	175	235	4.6	2.8	1.8	5.1	37	20	2.91727	accurate	3.64516
Male	55	1.42	0.92	4.44	1.37	1.25	2.9	279	241	4.6	5.5	-0.9	4.6	30	52	2.56727	accurate	3.46739
Female	65	0.93	0.88	3.91	1.21	0.92	2.32	325	251	4.6	2.4	2.2	21.4	32	12	2.44	accurate	3.39773
Female	29	0.67	1.13	4.01	2.41	0.56	2.29	176	229	4.6	1.9	2.7	2.7	51	18	2.35455	accurate	3.0531
Female	70	1.34	1.11	5.41	1.12	1.27	3.86	397	153	4.7	1.6	3.1	2.9	23	77	3.63091	accurate	3.72973
Female	67	1.53	1.14	6.4	2.72	1.47	3.74	337	190	4.7	2.5	2.2	2.6	21	25	3.69364	accurate	4.32456
Female	67	1.1	0.81	3.73	2.05	0.83	2.25	136	165	4.7	4.5	0.2	3.8	35	50	1.96818	accurate	3.58025
Female	70	1.2	0.86	4.33	1.28	1.19	2.76	139	178	4.8	1.5	3.3	1.4	8	10	2.55818	accurate	3.65116
Male	69	0.87	0.88	3.77	0.83	0.82	2.69	337	330	4.8	3	1.8	5.8	15	13	2.57273	accurate	3.35227
Female	57	0.93	1.6	7.1	0.91	0.98	5.64	391	350	4.9	1.5	3.4	2.2	21	13	5.70636	accurate	3.825
Female	47	1.31	1.18	4.93	2.41	0.97	3.17	186	199	4.9	2.4	2.5	12.6	66	65	2.86455	accurate	3.35593
Female	53	1.5	0.6	4.02	0.97	1.98	1.82	185	156	4.9	1.7	3.2	4.7	37	47	1.59909	accurate	3.4
Female	56	1.3	1.15	5.65	1.74	1.13	3.85	241	232	5	3.1	1.9	0.5	16	10	3.72909	accurate	3.93043
Female	63	1.97	1.12	6.43	1.39	1.94	4.03	149	281	5.1	2.9	2.2	5.1	37	18	3.85818	accurate	4.00893
Female	63	1.12	0.66	3.59	0.66	1.11	2.36	162	179	5.1	2.6	2.5	3.3	36	72	2.18	accurate	3.75758
Female	67	1.49	1	5.3	2.53	1.25	2.97	360	223	5.3	2.6	2.7	4.8	20	28	2.9	accurate	4.05
Female	58	1.28	0.89	5.04	0.6	1.75	3.19	412	502	5.5	3.7	1.8	12.9	124	97	3.01727	accurate	3.69663
Female	87	0.81	0.94	3.69	1.47	0.7	2.36	297	242	5.6	2.9	2.7	2.9	23	24	2.32182	accurate	3.18085
Female	23	0.91	0.82	3.65	0.97	0.88	2.33	275	189	5.6	2.2	3.4	6.6	107	193	2.32909	accurate	3.37805
Female	24	1.16	1.25	5.7	3.54	0.93	3.25	136	196	5.8	1	4.8	2.7	34	12	3.16091	accurate	3.816
Male	69	1.04	0.9	4.13	0.73	1.14	2.77	416	397	5.8	3.5	2.3	7.6	16	7	2.65818	accurate	3.32222
Male	68	0.75	0.68	3.19	0.66	0.91	2.13	413	441	5.8	3.4	2.4	14.8	24	12	1.98	accurate	3.35294
Male	62	1.32	0.69	3.65	1.04	1.4	2.16	221	196	6.1	3.2	2.9	3.5	43	34	1.77727	accurate	3.26087
Male	51	1.1	0.67	3.24	0.96	1.08	1.95	196	193	6.1	3.6	2.5	11.8	71	58	1.72364	accurate	3.22388
Female	75	1.38	0.61	3.59	1	1.3	1.94	335	276	6.1	2.8	3.3	5.9	99	229	1.83545	accurate	3.7541
Male	52	0.79	1.64	5.97	2.3	0.66	4.35	280	312	6.2	2.6	3.6	4.4	126	182	4.26455	accurate	3.2378
Male	67	1.21	1.13	5.82	1.24	1.05	4.25	216	203	6.2	4	2.2	3	17	21	4.20636	accurate	4.22124
Male	69	0.78	1.16	4.91	2.04	0.68	3.2	190	206	6.2	2.2	4	2	17	18	3.30273	accurate	3.64655
Male	66	1.39	1	5.14	1.84	1.15	3.17	355	373	6.2	2.4	3.8	23.2	48	42	3.15364	accurate	3.99
Female	69	1.59	0.66	4.08	0.97	1.71	1.97	372	244	6.2	3.4	2.8	7.2	336	625	1.92909	accurate	3.59091
Female	48	1.66	0.97	5.74	1.34	1.86	3.37	290	283	6.4	3	3.4	6.4	86	90	3.27091	inaccurate	4
Female	74	0.81	0.94	3.73	1.08	0.77	2.57	311	156	6.4	3.2	3.2	7.1	20	18	2.46909	accurate	3.14894
Female	57	0.81	0.91	3.4	1.24	0.68	2.11	627	551	6.4	2.9	3.5	4.6	82	68	2.15636	accurate	2.98901
Male	71	1.14	1.11	5.14	1.06	0.99	3.86	375	286	6.5	3	3.5	1.7	19	27	3.66818	accurate	3.73874
Female	65	1.22	0.66	3.48	0.94	1.28	1.91	185	181	6.5	2.6	3.9	1.6	20	12	1.77273	accurate	3.33333
Male	66	2.46	1.24	8.06	1.59	2.53	5.12	695	218	6.6	3.4	3.2	11.5	33	31	4.80727	accurate	4.45968
Male	74	1.43	1.08	4.99	1.81	1.17	3.45	525	191	6.6	1.9	4.7	0.6	21	15	2.99727	inaccurate	3.53704
Male	54	1.53	0.97	5.22	0.65	1.7	3.23	584	349	6.6	3	3.6	6.3	30	45	3.22455	accurate	3.62887
Male	72	1.07	0.81	4.16	0.8	1.21	2.44	245	208	6.6	2.8	3.8	2.6	62	104	2.58636	accurate	3.64198
Female	50	1.06	1.14	5.48	1.33	1.01	3.97	683	626	6.7	4.3	2.4	7.7	72	57	3.86545	accurate	3.92105
Male	69	1.02	0.88	3.94	0.73	1.09	2.62	396	402	6.7	4.3	2.4	6.6	17	10	2.51818	accurate	3.23864
Female	58	2.07	1.11	6.57	1.14	2.01	4.29	252	296	6.8	3.1	3.7	3.2	72	88	4.04182	inaccurate	4.10811
Male	69	0.85	0.84	3.49	0.84	0.88	2.39	425	351	6.8	4.5	2.3	13.8	20	13	2.22818	accurate	3.10714
Female	51	1.06	1.27	5.41	1.34	0.96	4.01	146	321	6.9	4	2.9	19.6	138	14	3.84091	accurate	3.50394
Female	69	1.34	1.15	5.52	0.82	1.54	3.51	258	216	6.9	2.7	4.2	7.1	51	35	3.60727	accurate	3.46087
Male	69	1.04	0.94	4.24	0.91	1.06	2.88	438	423	6.9	4	2.9	3.4	16	7	2.76636	accurate	3.38298
Male	82	0.75	0.84	3.54	1.02	0.77	2.17	316	250	6.9	4.6	2.3	12	65	46	2.30636	accurate	3.29762
Male	59	0.91	0.6	3.75	0.69	1.16	2.11	389	299	6.9	4.5	2.4	20.2	41	22	2.27636	accurate	4.31667
Male	80	0.83	1.3	5.88	0.73	0.8	4.78	259	315	7	3.4	3.6	7.6	47	27	4.74818	accurate	3.90769
Female	69	1.95	0.85	5.59	0.82	2.16	3.17	303	249	7	2.5	4.5	0.8	32	7	3.05727	accurate	4.03529
Male	69	1	0.88	3.81	0.76	1.05	2.57	406	401	7	3.8	3.2	4	16	8	2.41455	accurate	3.13636
Male	59	0.73	0.84	3.39	1.54	0.65	2.11	1063	422	7	3.8	3.2	12.3	61	46	2.04	accurate	3.2619
Male	69	0.87	0.89	3.71	0.93	0.88	2.5	430	374	7.1	4.2	2.9	10.3	20	14	2.40727	accurate	3.17978
Female	57	1.28	0.98	5.96	0.86	1.98	3.5	374	333	7.2	3.9	3.3	2.9	164	439	3.58909	accurate	4.06122
Male	69	0.76	0.78	3.39	0.89	0.86	2.26	445	411	7.2	4.3	2.9	14.1	36	15	2.12545	accurate	3.24359
Female	74	1.64	0.73	4.03	1.39	1.61	2.16	213	217	7.3	4.1	3.2	4.2	26	30	1.78818	accurate	3.31507
Male	61	1.23	0.98	4.92	1.64	1.2	3.36	283	200	7.4	2.2	5.2	5.4	26	26	2.97455	accurate	3.79592
Male	68	1.01	2.31	10.39	1.24	0.87	8.39	493	264	7.5	3.1	4.4	36.1	60	39	8.95636	accurate	4.12121
Male	54	1.18	1.08	4.97	1.18	0.99	3.45	215	196	7.5	4.3	3.2	5.3	19	22	3.44364	accurate	3.68519
Male	61	0.94	1.07	4.47	0.93	0.96	3.12	257	443	7.5	3.7	3.8	7.5	80	117	3.08727	accurate	3.28037
Female	76	1.33	0.7	3.48	0.91	1.35	1.85	531	151	7.5	1.4	6.1	3.4	70	41	1.71636	accurate	3.04286
Male	50	0.93	0.95	4.6	1.8	0.94	2.88	346	196	7.7	4.8	2.9	81.9	191	280	2.84182	accurate	3.85263
Male	54	0.71	1.51	6.54	1.12	0.68	5.07	297	271	7.8	2.5	5.3	1.9	45	12	5.35091	accurate	3.88079
Female	59	1.02	1.14	5.47	0.85	0.96	3.98	255	309	8	4.4	3.6	1.9	76	72	4.12364	accurate	3.95614
Male	69	1.23	0.91	4.18	1.64	1.14	2.5	489	205	8	2.5	5.5	4.2	12	20	2.29455	accurate	3.34066
Male	61	0.66	1.24	4.56	1.5	0.52	3.33	384	258	8.1	4.5	3.6	1.2	56	51	3.35818	accurate	3.25806
Female	69	1.55	0.68	3.83	1.34	1.52	1.91	332	155	8.2	3.2	5	2.4	27	22	1.70091	accurate	3.39706
Female	68	2.02	0.88	5.71	1.04	2.35	3.35	335	318	8.3	3	5.3	1.9	33	34	2.88727	accurate	3.81818
Male	45	1.09	0.91	4.11	1.56	0.84	2.72	203	195	8.3	2.4	5.9	16.9	37	28	2.56091	accurate	3.59341
Male	59	1.33	0.57	3.74	0.56	1.7	1.97	347	197	8.3	5.6	2.7	19.4	67	66	1.78545	accurate	3.57895
Female	63	0.94	0.94	4.21	1.22	0.89	2.8	165	198	8.4	4.3	4.1	5.8	35	40	2.76545	accurate	3.53191
Male	40	0.96	1.09	5.26	3.69	0.84	3.09	521	189	8.5	3.6	4.9	2.3	37	83	2.74273	accurate	4.05505
Male	53	1.08	1.13	4.61	1.52	0.88	3.03	420	412	8.5	3.7	4.8	1.2	45	16	3.03909	accurate	3.30088
Female	57	1.08	0.78	3.92	0.79	1.03	2.68	147	214	8.5	2.9	5.6	3.7	30	11	2.53091	accurate	3.70513
Female	48	1.52	1.13	5.97	1.27	1.56	3.95	242	222	8.7	3.1	5.6	5.4	49	170	3.83273	accurate	3.90265
Female	66	1.41	0.8	4.58	0.88	1.61	2.81	466	271	8.8	3.7	5.1	18.3	141	193	2.57	accurate	3.7125
Female	55	0.97	0.86	3.77	1.13	0.81	2.79	199	174	8.9	2.1	6.8	4	27	6	2.44636	accurate	3.44186
Male	59	1.22	0.67	4.27	0.62	1.6	2.56	405	249	9	5.1	3.9	32.8	63	57	2.38818	accurate	3.98507
Male	32	0.73	1.1	4.41	1.61	0.64	3	290	228	9.1	4	5.1	2.6	88	187	3.03818	accurate	3.42727
Male	72	1.18	0.88	4.33	0.76	1.2	2.78	267	318	9.1	5	4.1	8.1	26	7	2.78455	accurate	3.55682
Male	62	1.36	0.68	4.08	0.52	1.63	2.3	576	417	9.1	7.1	2	36.2	95	53	2.21364	accurate	3.60294
Female	58	0.83	0.7	3.19	0.74	0.76	2.09	228	391	9.2	5.3	3.9	7.5	14	6	2.09364	accurate	3.47143
Male	33	1.42	0.59	4.22	1.94	1.1	2.2	225	214	9.3	3.7	5.6	12.7	145	182	2.23818	accurate	5.28814
Male	70	0.69	1.39	5.58	1.44	0.6	4.37	961	821	9.4	5.8	3.6	23	100	39	4.32545	accurate	3.58273
Female	65	1.34	0.94	4.87	1.41	1.29	3.22	287	212	9.5	4.9	4.6	40.8	201	129	2.93909	accurate	3.80851
Male	73	1.11	0.77	3.73	0.93	1.13	2.56	202	197	9.5	3.7	5.8	19.2	31	24	2.17727	accurate	3.37662
Male	51	0.92	1.1	4.51	1.39	0.68	3.23	261	192	9.6	3.4	6.2	1.7	47	108	3.19818	accurate	3.48182
Female	49	0.76	1.06	4.37	1.16	0.64	3	150	415	9.6	4.8	4.8	5.6	29	32	3.20273	accurate	3.51887
Female	23	1.06	0.64	3.39	1.47	1.16	1.83	204	154	9.6	3.9	5.7	2.6	64	288	1.56182	accurate	3.48438
Female	60	0.96	0.89	4.28	0.68	1.07	2.86	362	242	9.7	4.3	5.4	2.2	37	58	2.90091	accurate	3.60674
Male	54	0.71	0.83	3.39	0.83	0.65	2.52	198	217	9.7	4.3	5.4	3.7	34	70	2.36273	accurate	3.3012
Male	50	0.99	0.91	4.15	0.85	1.07	2.85	182	238	9.8	5.1	4.7	4.8	35	48	2.69364	accurate	3.38462
Male	72	1.44	0.74	4.05	0.52	1.59	2.44	265	230	9.8	6.6	3.2	5	13	7	2.22364	accurate	3.32432
Female	91	1.25	0.78	4.33	0.92	1.51	2.21	260	186	9.8	5.1	4.7	3.7	25	63	2.40182	accurate	3.61538
Female	58	1.75	0.89	5.76	0.83	1.95	3.55	240	172	10	4.9	5.1	6.5	28	41	3.43273	accurate	4.2809
Female	77	1.27	1	4.81	1.04	1.45	3.25	160	196	10.2	3	7.2	0.4	35	32	2.88727	accurate	3.36
Female	62	1.84	0.89	5.35	1.68	1.9	3.1	220	219	10.2	3.7	6.5	2	29	28	2.68636	accurate	3.8764
Male	55	0.43	0.95	3.22	1.2	0.37	2.18	244	273	10.3	5.3	5	8.2	90	33	2.30455	accurate	3
Male	69	1.02	1.42	6.68	0.85	1.29	5.28	904	419	10.4	6.1	4.3	26.1	74	56	5.00364	accurate	3.79577
Female	69	0.57	1.14	4.22	2	0.47	2.72	383	154	10.4	7.2	3.2	1.7	26	24	2.84091	accurate	3.28947
Female	51	1.05	0.95	4.81	1.27	1.26	3.14	280	263	10.5	6.3	4.2	102.9	88	215	2.97273	accurate	3.73684
Male	72	1.49	0.88	4.7	0.73	1.62	3.03	287	259	10.5	6.7	3.8	5.8	15	9	2.74818	accurate	3.5
Male	72	0.72	0.65	2.71	0.78	0.56	1.87	238	411	10.5	5	5.5	15.8	115	43	1.79545	accurate	3.30769
Male	61	0.97	1.21	5.45	1.11	1.06	4.03	386	293	10.6	4.7	5.9	1.9	39	59	3.88545	accurate	3.6281
Female	66	1.35	1.47	6.82	1.24	1.21	5.21	482	214	10.7	4.1	6.6	5	54	21	5.04636	accurate	3.81633
Female	47	1.38	1.1	5.22	1.79	1.16	3.72	138	167	10.7	2.9	7.8	22.1	54	35	3.24636	inaccurate	3.69091
Female	56	1.63	0.82	4.47	1.02	1.81	2.54	247	248	10.7	7	3.7	9.7	31	28	2.19636	accurate	3.2439
Male	54	1.06	0.82	4.09	1.71	0.92	2.44	528	260	10.7	6.1	4.6	14.1	280	326	2.39273	accurate	3.86585
Male	57	1.36	0.86	5.05	1.21	1.32	3.27	623	220	11	5.1	5.9	29.3	60	68	3.18	accurate	4.33721
Male	77	0.8	0.96	4.16	1.12	0.88	2.98	441	292	11	6.8	4.2	8.6	66	78	2.77091	accurate	3.41667
Male	56	0.95	1.02	4.36	1.54	0.87	2.72	379	220	11	4.9	6.1	6.1	20	17	2.79	accurate	3.42157
Female	56	2.09	0.64	4.99	0.76	2.53	2.35	316	220	11	5.6	5.4	17.3	50	37	2.11455	accurate	3.84375
Male	31	1.37	0.72	4.33	0.35	1.65	2.55	236	188	11.1	5.1	6	2	18	34	2.52091	accurate	3.72222
Male	56	1.37	1.28	6.18	1.72	1.23	4.37	219	240	11.3	3.5	7.8	3.3	62	104	4.16818	accurate	3.86719
Male	56	1.37	0.98	4.46	1.16	1.08	3.15	238	354	11.3	6	5.3	9.7	32	51	2.85273	accurate	3.44898
Male	65	0.66	0.9	3.49	0.75	0.66	2.58	386	291	11.4	6.7	4.7	3.3	34	54	2.48909	accurate	3.14444
Female	69	2.05	1.11	8.31	0.7	3.25	4.78	360	405	11.5	6.6	4.9	16.9	33	65	4.74182	accurate	4.55856
Male	67	1.35	1.06	4.99	4.22	1.11	2.64	241	336	11.5	5.2	6.3	2.9	177	17	1.96182	accurate	3.66038
Female	47	1.4	1.3	5.68	2.69	1.23	3.85	178	216	11.6	2.5	9.1	8.8	59	41	3.22727	inaccurate	3.42308
Female	77	1.11	0.88	4.3	1.02	1.27	2.62	184	267	11.7	4.6	7.1	3.5	35	28	2.56636	accurate	3.44318
Female	56	1.39	0.85	4.25	1.29	1.51	2.59	264	251	11.8	7.3	4.5	12.3	46	41	2.15364	accurate	3.22353
Female	52	1.21	1.1	5.68	2.07	1.07	3.67	700	383	11.9	6.8	5.1	5.7	71	130	3.66909	accurate	4.19091
Female	56	1.41	0.84	4.36	1.08	1.55	2.58	1046	505	12	6.4	5.6	1.5	42	37	2.31909	accurate	3.34524
Male	40	0.96	0.9	4.47	4.92	0.74	2.25	701	217	12	7.3	4.7	6.7	57	136	1.49364	accurate	4.14444
Male	49	1.1	1.07	4.82	0.95	1.04	3.47	216	209	12.3	3	9.3	1.2	23	47	3.34818	inaccurate	3.53271
Female	64	0.85	0.98	4.08	1.59	0.68	2.9	378	228	12.6	8.7	3.9	5.5	34	61	2.67727	accurate	3.46939
Female	80	0.69	0.89	4.03	0.93	0.78	2.99	343	229	13	8.7	4.3	2.6	51	43	2.82727	accurate	3.65169
Female	58	1.27	0.74	4.04	0.65	1.34	2.45	515	191	13	5.8	7.2	10.7	81	60	2.40455	accurate	3.64865
Male	53	0.91	1.06	4.87	1.53	0.84	3.54	595	229	13.1	5.5	7.6	3.5	34	26	3.33455	inaccurate	3.80189
Male	54	0.84	1.14	5.23	1.72	0.68	3.45	198	269	13.1	7.9	5.2	3.8	119	170	3.76818	accurate	3.99123
Male	72	0.84	0.79	3.48	0.8	0.79	2.53	266	447	13.1	7.2	5.9	55.3	242	54	2.32636	accurate	3.40506
Female	61	0.62	1.96	6.97	3.3	0.36	4.67	450	269	13.2	9.6	3.6	9.6	69	11	5.11	accurate	3.37245
Female	35	1.29	1.51	7.14	7.35	0.92	3.88	1174	224	13.6	7.6	6	7.1	149	130	2.87909	inaccurate	4.11921
Male	51	0.93	1.05	4.68	0.94	0.96	3.47	191	287	13.7	5.9	7.8	3.3	31	27	3.29273	inaccurate	3.54286
Male	73	1.2	1.06	4.78	1.6	1.04	3.03	461	418	13.7	7.3	6.4	4.7	64	48	3.01273	accurate	3.5283
Female	28	0.79	1.37	5.33	1.35	0.7	3.55	227	255	13.8	7.1	6.7	5.2	94	22	4.01636	accurate	3.37956
Male	41	0.49	1.1	4.4	1.12	0.41	3.44	350	267	14.2	4.5	9.7	17.3	102	29	3.48091	accurate	3.62727
Male	32	0.51	0.83	3.45	0.78	0.62	2.24	498	272	14.3	9.1	5.2	6.7	42	67	2.47545	accurate	3.40964
Female	56	1.3	1.08	5.54	1.08	1.55	3.57	304	167	14.4	8.9	5.5	85.5	60	17	3.49909	accurate	3.69444
Female	54	2.21	0.77	5.7	1.16	2.68	2.66	181	186	14.4	6.8	7.6	32.3	120	128	2.49273	accurate	3.92208
Female	56	0.84	0.88	3.43	1.63	0.74	2.07	428	600	14.4	10	4.4	4.9	25	17	1.94909	accurate	3.05682
Female	66	0.8	1.12	4.2	1.42	0.73	2.97	142	207	14.7	8.4	6.3	3.6	72	53	2.82455	accurate	3.09821
Male	51	0.85	1.2	4.73	1.16	0.77	3.57	277	200	14.8	6.8	8	0.8	28	48	3.43273	accurate	3.3
Male	74	1.23	0.76	3.98	0.87	1.39	2.33	644	368	15.4	7.8	7.6	1.1	33	40	2.19455	accurate	3.40789
Male	61	0.94	1.13	4.94	0.82	0.93	3.71	446	191	15.5	7.3	8.2	32.2	45	29	3.63727	accurate	3.54867
Female	77	0.47	0.82	2.97	0.96	0.49	1.92	242	173	15.5	11.4	4.1	9	65	12	2.04364	accurate	3.02439
Male	61	1.06	1.24	5.95	0.89	1.19	4.34	1726	640	15.8	7	8.8	5.9	32	8	4.35545	accurate	3.83871
Male	29	0.64	1.31	4.51	1.29	0.62	3.21	191	249	15.8	7.7	8.1	2.9	39	42	3.30364	accurate	2.96947
Male	88	1	1.26	5.21	1.29	0.93	3.59	325	210	15.9	9.1	6.8	1.9	66	81	3.69364	accurate	3.39683
Female	54	0.74	1.01	4.21	1.78	0.64	2.67	277	335	15.9	7.8	8.1	2.2	44	74	2.76091	accurate	3.53465
Male	88	0.86	0.84	3.91	0.93	0.99	2.57	252	258	16.2	10.6	5.6	12.2	56	26	2.49727	accurate	3.47619
Female	47	1.35	1.24	5.56	2.14	1.15	3.73	205	169	16.3	4.4	11.9	4.3	60	47	3.43727	accurate	3.55645
Male	44	1.02	0.88	3.95	0.77	1.06	2.66	983	196	16.3	10.4	5.9	9.4	54	43	2.54	accurate	3.28409
Female	67	0.93	1.29	5.85	1.35	1.08	4.35	359	210	16.7	12.2	4.5	40.8	21	18	4.15636	accurate	3.69767
Male	72	1.16	0.79	4.03	0.94	1.31	2.37	223	300	16.8	12.1	4.7	12.7	19	8	2.29273	accurate	3.44304
Male	50	1.44	0.73	4.26	0.65	1.59	2.46	200	200	16.9	10.1	6.8	210.2	3699	3687	2.37455	accurate	3.65753
Male	1	2.08	0.81	6.24	1.34	2.92	3.17	267	304	17.1	12	5.1	66.5	113	53	2.71091	accurate	4.09877
Male	65	1.05	0.83	4.1	0.65	1.24	2.56	234	202	17.1	9.8	7.3	3.7	60	56	2.56455	accurate	3.44578
Male	68	0.85	0.85	3.7	0.77	0.86	2.43	276	204	17.2	9.6	7.6	5	36	20	2.49	accurate	3.34118
Male	62	1.18	0.74	3.69	0.7	1.37	2.19	230	198	17.3	10	7.3	12	64	76	2.00182	accurate	3.13514
Male	67	0.76	0.85	3.22	1.14	0.76	1.95	344	355	17.4	11.5	5.9	9.7	39	29	1.94182	accurate	2.89412
Male	55	0.93	2.2	9.19	1.88	0.9	7.74	211	288	17.6	9.3	8.3	11.5	44	19	7.43545	accurate	3.76818
Male	68	1.45	1.28	6.24	0.93	1.56	4.59	245	238	17.6	6.3	11.3	6.5	49	52	4.25727	accurate	3.65625
Female	72	0.71	0.72	3.38	0.96	0.91	2.18	315	274	17.6	13	4.6	26	80	29	2.03364	accurate	3.43056
Female	50	1.01	1.46	7.12	1.89	0.89	5.27	653	588	18.1	12.4	5.7	30.2	51	67	5.37091	accurate	4.26712
Male	56	1.14	1.11	5.15	1.49	1.08	3.38	288	324	18.6	9.2	9.4	4.7	70	87	3.39273	accurate	3.66667
Male	48	0.94	0.68	2.85	1.08	0.8	1.84	241	225	18.6	12.4	6.2	22	24	17	1.55909	accurate	3.01471
Female	60	0.41	1.53	5.08	1.71	0.3	4.03	196	344	18.8	9.5	9.3	3.6	62	16	4.00273	accurate	3.12418
Female	61	1.83	1.17	6	2.63	1.69	3.11	282	194	18.8	7.6	11.2	21.5	39	33	3.11455	accurate	3.68376
Male	40	0.6	1.06	4.13	1.44	0.47	2.96	249	535	19.2	9.4	9.8	18.2	37	14	3.00545	accurate	3.45283
Female	77	0.76	0.97	3.95	1.25	0.62	2.68	457	342	19.3	11.3	8	8.8	126	21	2.76182	accurate	3.43299
Male	57	0.96	1.72	7.4	1.6	0.87	5.71	354	200	19.5	8.9	10.6	25.3	90	39	5.80273	accurate	3.79651
Female	56	0.51	0.91	3.29	2.02	0.47	1.88	234	295	19.5	10.5	9	2.4	56	11	1.90182	accurate	3.0989
Female	56	1.35	1.5	6.77	3.36	1.04	4.67	1437	199	19.6	11.8	7.8	3.3	112	448	4.20273	accurate	3.82
Male	64	0.51	1.54	5.91	1.94	0.46	4.32	312	264	19.8	11.1	8.7	6.5	109	38	4.56818	accurate	3.53896
Male	46	0.86	1.09	4.6	0.82	0.86	3.57	394	238	20	9.5	10.5	3.4	71	22	3.36727	inaccurate	3.43119
Female	68	1.78	0.96	5.56	1.42	2.02	3.13	486	544	20.2	15.2	5	9.2	60	54	2.89455	accurate	3.6875
Male	48	0.63	0.78	3.28	0.8	0.61	2.44	298	189	20.4	10.1	10.3	27.4	492	84	2.30636	accurate	3.42308
Female	70	1.11	0.95	4.93	0.65	1.22	3.48	154	216	20.5	11.5	9	42.4	52	29	3.41455	accurate	3.90526
Female	64	1.13	0.88	5.39	0.59	1.7	3.6	231	207	20.8	16.4	4.4	65.1	31	21	3.42182	accurate	4.19318
Female	69	1.02	0.9	4.43	1.18	1.14	2.94	169	213	20.8	12.8	8	31.4	45	55	2.75364	accurate	3.65556
Female	61	1.75	1.1	5.59	2.2	1.63	3.08	265	152	21.2	8.3	12.9	20.4	42	32	2.96	accurate	3.6
Female	70	1.22	0.59	4.18	0.55	2.16	1.89	481	264	21.8	16.9	4.9	47.1	50	24	1.77	accurate	3.42373
Male	58	1.07	1.14	6.69	0.73	1.48	4.73	189	589	22.1	11.8	10.3	15.2	93	20	4.87818	accurate	4.57018
Female	58	0.95	0.91	4.05	1.44	0.83	2.77	226	185	22.1	13.3	8.8	21.8	257	192	2.56545	accurate	3.53846
Female	57	0.51	1.23	4.23	1.39	0.44	2.8	414	481	22.2	11.2	11	7.7	56	15	3.15818	accurate	3.0813
Male	64	0.91	0.72	3.36	0.68	1.05	2.2	457	856	22.4	14.9	7.5	7.9	45	29	2.00091	accurate	3.20833
Male	80	0.97	0.99	4.88	0.78	1.09	3.38	524	223	22.5	13.6	8.9	17.4	144	27	3.43545	accurate	3.82828
Female	80	1.8	0.71	4.66	1.23	1.65	2.65	302	164	22.8	15.6	7.2	18.5	183	162	2.45091	accurate	4.23944
Male	45	0.92	0.63	3.66	1.2	1.11	2.03	400	336	23.3	14.8	8.5	21.3	351	636	2.00455	accurate	4.04762
Male	40	0.78	1.28	5.26	2.99	0.55	2.89	359	199	23.9	16.5	7.4	3.7	45	41	3.35091	accurate	3.67969
Male	57	0.85	1.23	4.99	1.42	0.69	3.66	491	199	24.2	10.9	13.3	22.8	49	22	3.65455	accurate	3.49593
Female	80	1.11	1.55	8.35	1.02	1.56	6.35	754	860	24.3	17.6	6.7	17	96	63	6.32636	accurate	4.38065
Male	54	0.51	1.1	4.17	1.14	0.49	3.21	193	204	24.3	13.1	11.2	43.4	142	8	3.16182	accurate	3.34545
Male	63	1.49	0.69	4.14	0.8	1.83	2.18	274	191	24.3	12.6	11.7	42.2	69	26	1.94636	accurate	3.34783
Male	41	0.12	1.59	5.8	3.02	0.15	2.76	242	192	24.5	8.7	15.8	22.3	223	17	4.27727	inaccurate	3.55346
Male	39	0.67	0.79	3.24	1.33	0.54	2.05	287	216	24.9	17.8	7.1	6.7	91	56	2.09545	accurate	3.41772
Female	81	0.56	0.92	3.8	1.25	0.53	1.85	191	312	25	21.7	3.3	24.1	141	22	2.70182	accurate	3.55435
Male	48	1.23	0.74	3.63	1.39	1.08	2.11	299	229	25.6	17.8	7.8	5.7	66	100	1.91818	accurate	3.44595
Male	78	0.86	1	4.88	0.95	1.09	3.36	645	330	26.2	16.6	9.6	7	71	34	3.35818	accurate	3.79
Female	81	0.55	1.24	5.31	1.49	0.56	3.73	598	602	26.3	19.6	6.7	46.2	62	25	4.07273	accurate	3.83065
Male	84	1.05	1.17	5.26	1.5	1.09	3.77	349	276	26.4	17.6	8.8	11.9	115	62	3.48818	accurate	3.5641
Male	62	1.6	0.75	4.94	0.97	2.15	2.63	323	307	27.2	14.3	12.9	29.1	46	27	2.34909	accurate	3.72
Male	64	0.46	1.41	5.71	1.94	0.42	3.85	322	313	27.9	16.6	11.3	13.5	168	62	4.40818	inaccurate	3.75177
Male	61	1.02	1.26	6.08	1.02	1.15	4.55	746	638	28.2	17	11.2	19.1	95	45	4.46636	accurate	3.9127
Female	56	1.12	0.88	4.48	1.5	1.11	2.86	391	328	28.4	14	14.4	15.9	340	422	2.68818	accurate	3.82955
Male	62	0.62	0.82	3.33	0.57	0.73	2.56	322	333	29.2	21	8.2	5.1	30	46	2.34091	accurate	3.17073
Female	32	1.78	1.4	11.85	2.33	3.39	7.38	452	729	29.5	22	7.5	21.8	108	143	7.40091	accurate	6.04286
Male	50	0.84	1.11	4.9	0.93	0.77	3.51	554	324	29.6	17.5	12.1	14.5	191	84	3.70727	accurate	3.72072
Female	67	1.5	0.65	3.83	0.67	1.69	2.07	177	153	29.8	18.3	11.5	3.6	14	25	1.83545	accurate	3.29231
Female	70	1.21	0.99	5.13	0.92	1.63	3.12	675	216	30.5	20.4	10.1	243.9	104	218	3.08182	accurate	3.53535
Female	25	0.73	1.7	5.27	3.25	0.41	1.93	1128	232	30.5	19.9	10.6	111.9	387	100	3.38273	inaccurate	2.85882
Male	69	0.92	0.91	4.4	1.77	0.76	2.96	1562	312	31.4	20.6	10.8	148.1	530	457	2.83545	accurate	4
Female	56	1.03	0.81	4.1	1.02	1.27	2.6	727	558	31.6	19.8	11.8	4.3	23	16	2.36636	accurate	3.49383
Male	57	1.15	0.92	4.75	1.39	1.13	3.21	277	300	32.4	22.9	9.5	5.4	30	21	2.98818	accurate	3.93478
Male	69	1.18	0.61	3.97	0.98	1.39	1.99	711	279	33.1	21.9	11.2	98	122	201	2.13455	accurate	4.22951
Male	71	0.67	0.92	4.6	0.67	0.91	3.36	348	229	34.2	16.6	17.6	77.1	107	49	3.38545	inaccurate	4.01087
Male	71	0.57	1.23	5.6	2.39	0.49	3.01	601	395	34.7	26.4	8.3	26	73	16	4.02364	inaccurate	4.15447
Female	49	1.04	0.71	3.73	1.9	0.9	2.39	395	157	34.8	24.1	10.7	75.7	521	460	1.96636	accurate	3.98592
Male	80	0.9	0.91	4.46	0.55	1.03	3.09	641	226	35.1	22.2	12.9	5.1	99	25	3.18	accurate	3.76923
Male	44	0.34	2.49	13.4	4.46	0.35	9.07	1398	191	35.3	20.2	15.1	48.9	227	85	11.0227	accurate	5.24096
Male	80	0.87	0.88	4.38	0.62	0.99	3.09	617	209	36.3	23.2	13.1	4.7	125	25	3.10818	accurate	3.85227
Male	63	0.85	0.89	3.96	0.88	0.79	2.84	509	188	36.7	19.8	16.9	24.7	64	46	2.77	accurate	3.5618
Male	51	0.82	1.58	7.04	1.49	0.85	5.6	224	263	37.2	18.7	18.5	65	437	322	5.51273	accurate	3.91772
Male	53	0.9	1.09	4.8	1.74	0.84	3.26	989	228	37.5	25.2	12.3	39.6	66	95	3.16909	accurate	3.63303
Male	80	0.91	0.95	4.57	0.62	1.11	3.33	856	293	38	24.5	13.5	5.4	102	25	3.17818	accurate	3.64211
Male	64	0.69	1.19	5.1	1.38	0.73	3.59	563	383	38.6	29.4	9.2	181.2	397	103	3.74273	accurate	3.67227
Male	78	0.71	1	4.28	1.11	0.65	3.06	762	572	38.8	24.2	14.6	31.5	102	52	3.12545	accurate	3.63
Male	55	1.01	2.38	11.26	1.91	1.13	9.45	443	416	39.5	23.6	15.9	25.3	107	63	9.26182	accurate	4.2563
Female	81	0.6	1.63	6.64	1.92	0.5	4.43	619	593	39.5	26.7	12.8	21.8	62	34	5.26727	accurate	3.76687
Male	83	0.69	1.12	4.31	1.04	0.64	3.11	656	452	40.5	27.1	13.4	35	98	52	3.19727	accurate	3.27679
Female	50	1.3	0.91	4.95	1.57	1.53	2.62	238	288	42.2	32.3	9.9	187.4	852	1068	2.70636	accurate	3.75824
Female	57	0.74	0.83	3.45	1.2	0.64	2.1	265	266	42.5	26.7	15.8	15	34	20	2.26455	accurate	3.38554
Female	33	1.12	1.24	5.04	1.45	0.86	3.48	179	167	46.1	26.7	19.4	2.1	44	48	3.52091	accurate	3.37097
Female	59	0.96	1.31	5.16	1.41	0.84	3.58	402	171	47.4	37	10.4	10.5	36	25	3.67909	accurate	3.29771
Female	42	1.07	0.87	4.47	0.92	1.6	2.52	475	156	49.7	34.9	14.8	130.5	120	467	2.45182	accurate	3.29885
Male	46	1.62	0.71	4.51	0.56	1.75	2.65	653	214	49.9	32.3	17.6	376.7	140	229	2.50545	accurate	3.88732
Female	58	0.84	0.84	3.91	0.79	0.96	2.71	527	740	51.1	39.7	11.4	11.9	64	44	2.59091	accurate	3.5119
